# Supplementary material for: The fungal pathogen Batrachochytrium salamandrivorans is not detected in wild and captive amphibians from Mexico
Source: PeerJ. 2022 Oct 3;10:e14117. doi: 10.7717/peerj.14117 (PMC9536319; doi:10.7717/peerj.14117)
Supplement: Table S1 [file peerj-10-14117-s001.xlsx]

## Sheet: TableS1
SUPPORTING INFORMATION
Table S1. Skin swab samples taken for the detection of Batrachochytrium salamandrivorans (Bsal).
Species	Genus	Family	IUCN	Endemic to Mexico	Latitude	Longitude	Sampling Year	Source	DNA Extraction method	Bsal detection method	Bsal detection	Amphibian richness in sampled site	Bsal suitability (García-Rodríguez et al. 2022)	Bsal suitability category according to Basanta et al. (2019)
Agalychnis callydrias	Agalychnis	Phyllomedusidae	LC	No	17.6941	-92.1681	2016	Field swab	Prepman Ultra	Fluidigm Juno system	Negative	19	0.02	Not suitable
Agalychnis callydrias	Agalychnis	Phyllomedusidae	LC	No	16.8801	-93.4569	2016	Field swab	Prepman Ultra	Fluidigm Juno system	Negative	19	0.02	Not suitable
Agalychnis callydrias	Agalychnis	Phyllomedusidae	LC	No	19.9764	-89.048	2018	Field swab	Prepman Ultra	Fluidigm Juno system	Negative	12	0.01	Not suitable
Agalychnis dacnicolor	Agalychnis	Phyllomedusidae	LC	Yes	18.5948	-99.381	2015	Field swab	Prepman Ultra	Fluidigm Juno system	Negative	10	0.01	Not suitable
Agalychnis dacnicolor	Agalychnis	Phyllomedusidae	LC	Yes	18.4538	-99.1197	2015	Field swab	Prepman Ultra	Fluidigm Juno system	Negative	9	0.01	Not suitable
Agalychnis dacnicolor	Agalychnis	Phyllomedusidae	LC	Yes	23.5563	-106.467	2015	Field swab	Prepman Ultra	Fluidigm Juno system	Negative	19	0.01	Not suitable
Agalychnis dacnicolor	Agalychnis	Phyllomedusidae	LC	Yes	19.6131	-104.873	2017	Field swab	Prepman Ultra	Fluidigm Juno system	Negative	22	0.01	Not suitable
Agalychnis moreletii	Agalychnis	Phyllomedusidae	LC	Yes	17.6941	-92.1681	2016	Field swab	Prepman Ultra	Fluidigm Juno system	Negative	19	0.02	Not suitable
Agalychnis moreletii	Agalychnis	Phyllomedusidae	LC	Yes	15.3239	-92.4819	2016	Field swab	Prepman Ultra	Fluidigm Juno system	Negative	18	0.02	Not suitable
Agalychnis moreletii	Agalychnis	Phyllomedusidae	LC	Yes	16.8801	-93.4569	2016	Field swab	Prepman Ultra	Fluidigm Juno system	Negative	19	0.02	Not suitable
Agalychnis moreletii	Agalychnis	Phyllomedusidae	LC	Yes	15.3397	-92.5128	2016	Field swab	Prepman Ultra	Fluidigm Juno system	Negative	16	0.01	Not suitable
Agalychnis moreletii	Agalychnis	Phyllomedusidae	LC	Yes	18.5462	-96.7735	2016	Field swab	Prepman Ultra	Fluidigm Juno system	Negative	17	0.01	Not suitable
Ambystoma altamirani	Ambystoma	Ambystomatidae	EN	Yes	19.6333	-99.4833	2019	Field swab	Prepman Ultra	qPCR	Negative	10	0.5	Moderate suitability
Ambystoma altamirani	Ambystoma	Ambystomatidae	EN	Yes	19.5181	-99.4319	2019	Field swab	Prepman Ultra	qPCR	Negative	11	0.51	Moderate suitability
Ambystoma altamirani	Ambystoma	Ambystomatidae	EN	Yes	19.5683	-99.5	2021	Field swab	Qiagen DNeasy Blood and Tissue Kit	qPCR	Negative	11	0.61	Moderate suitability
Ambystoma altamirani	Ambystoma	Ambystomatidae	EN	Yes	19.5683	-99.5	2021	Field swab	Qiagen DNeasy Blood and Tissue Kit	qPCR	Negative	11	0.61	Moderate suitability
Ambystoma altamirani	Ambystoma	Ambystomatidae	EN	Yes	19.5683	-99.5	2021	Field swab	Qiagen DNeasy Blood and Tissue Kit	qPCR	Negative	11	0.61	Moderate suitability
Ambystoma altamirani	Ambystoma	Ambystomatidae	EN	Yes	19.5683	-99.5	2021	Field swab	Qiagen DNeasy Blood and Tissue Kit	qPCR	Negative	11	0.61	Moderate suitability
Ambystoma altamirani	Ambystoma	Ambystomatidae	EN	Yes	19.5683	-99.5	2021	Field swab	Qiagen DNeasy Blood and Tissue Kit	qPCR	Negative	11	0.61	Moderate suitability
Ambystoma altamirani	Ambystoma	Ambystomatidae	EN	Yes	19.5683	-99.5	2021	Field swab	Qiagen DNeasy Blood and Tissue Kit	qPCR	Negative	11	0.61	Moderate suitability
Ambystoma altamirani	Ambystoma	Ambystomatidae	EN	Yes	19.5683	-99.5	2021	Field swab	Qiagen DNeasy Blood and Tissue Kit	qPCR	Negative	11	0.61	Moderate suitability
Ambystoma altamirani	Ambystoma	Ambystomatidae	EN	Yes	19.5683	-99.5	2021	Field swab	Qiagen DNeasy Blood and Tissue Kit	qPCR	Negative	11	0.61	Moderate suitability
Ambystoma altamirani	Ambystoma	Ambystomatidae	EN	Yes	19.5683	-99.5	2021	Field swab	Qiagen DNeasy Blood and Tissue Kit	qPCR	Negative	11	0.61	Moderate suitability
Ambystoma altamirani	Ambystoma	Ambystomatidae	EN	Yes	19.5683	-99.5	2021	Field swab	Qiagen DNeasy Blood and Tissue Kit	qPCR	Negative	11	0.61	Moderate suitability
Ambystoma altamirani	Ambystoma	Ambystomatidae	EN	Yes	19.5253	-99.436	2021	Field swab	Qiagen DNeasy Blood and Tissue Kit	qPCR	Negative	11	0.51	Moderate suitability
Ambystoma altamirani	Ambystoma	Ambystomatidae	EN	Yes	19.5253	-99.436	2021	Field swab	Qiagen DNeasy Blood and Tissue Kit	qPCR	Negative	11	0.51	Moderate suitability
Ambystoma altamirani	Ambystoma	Ambystomatidae	EN	Yes	19.5253	-99.436	2021	Field swab	Qiagen DNeasy Blood and Tissue Kit	qPCR	Negative	11	0.51	Moderate suitability
Ambystoma altamirani	Ambystoma	Ambystomatidae	EN	Yes	19.5253	-99.436	2021	Field swab	Qiagen DNeasy Blood and Tissue Kit	qPCR	Negative	11	0.51	Moderate suitability
Ambystoma altamirani	Ambystoma	Ambystomatidae	EN	Yes	19.5253	-99.436	2021	Field swab	Qiagen DNeasy Blood and Tissue Kit	qPCR	Negative	11	0.51	Moderate suitability
Ambystoma altamirani	Ambystoma	Ambystomatidae	EN	Yes	19.5253	-99.436	2021	Field swab	Qiagen DNeasy Blood and Tissue Kit	qPCR	Negative	11	0.51	Moderate suitability
Ambystoma altamirani	Ambystoma	Ambystomatidae	EN	Yes	19.5253	-99.436	2021	Field swab	Qiagen DNeasy Blood and Tissue Kit	qPCR	Negative	11	0.51	Moderate suitability
Ambystoma altamirani	Ambystoma	Ambystomatidae	EN	Yes	19.5253	-99.436	2021	Field swab	Qiagen DNeasy Blood and Tissue Kit	qPCR	Negative	11	0.51	Moderate suitability
Ambystoma altamirani	Ambystoma	Ambystomatidae	EN	Yes	19.5253	-99.436	2021	Field swab	Qiagen DNeasy Blood and Tissue Kit	qPCR	Negative	11	0.51	Moderate suitability
Ambystoma altamirani	Ambystoma	Ambystomatidae	EN	Yes	19.5253	-99.436	2021	Field swab	Qiagen DNeasy Blood and Tissue Kit	qPCR	Negative	11	0.51	Moderate suitability
Ambystoma altamirani	Ambystoma	Ambystomatidae	EN	Yes	19.5253	-99.436	2021	Field swab	Qiagen DNeasy Blood and Tissue Kit	qPCR	Negative	11	0.51	Moderate suitability
Ambystoma altamirani	Ambystoma	Ambystomatidae	EN	Yes	19.5253	-99.436	2021	Field swab	Qiagen DNeasy Blood and Tissue Kit	qPCR	Negative	11	0.51	Moderate suitability
Ambystoma altamirani	Ambystoma	Ambystomatidae	EN	Yes	19.5253	-99.436	2021	Field swab	Qiagen DNeasy Blood and Tissue Kit	qPCR	Negative	11	0.51	Moderate suitability
Ambystoma altamirani	Ambystoma	Ambystomatidae	EN	Yes	19.5253	-99.436	2021	Field swab	Qiagen DNeasy Blood and Tissue Kit	qPCR	Negative	11	0.51	Moderate suitability
Ambystoma altamirani	Ambystoma	Ambystomatidae	EN	Yes	19.5253	-99.436	2021	Field swab	Qiagen DNeasy Blood and Tissue Kit	qPCR	Negative	11	0.51	Moderate suitability
Ambystoma altamirani	Ambystoma	Ambystomatidae	EN	Yes	19.5253	-99.436	2021	Field swab	Qiagen DNeasy Blood and Tissue Kit	qPCR	Negative	11	0.51	Moderate suitability
Ambystoma altamirani	Ambystoma	Ambystomatidae	EN	Yes	19.5253	-99.436	2021	Field swab	Qiagen DNeasy Blood and Tissue Kit	qPCR	Negative	11	0.51	Moderate suitability
Ambystoma altamirani	Ambystoma	Ambystomatidae	EN	Yes	19.5253	-99.436	2021	Field swab	Qiagen DNeasy Blood and Tissue Kit	qPCR	Negative	11	0.51	Moderate suitability
Ambystoma altamirani	Ambystoma	Ambystomatidae	EN	Yes	19.5253	-99.436	2021	Field swab	Qiagen DNeasy Blood and Tissue Kit	qPCR	Negative	11	0.51	Moderate suitability
Ambystoma altamirani	Ambystoma	Ambystomatidae	EN	Yes	19.5253	-99.436	2021	Field swab	Qiagen DNeasy Blood and Tissue Kit	qPCR	Negative	11	0.51	Moderate suitability
Ambystoma altamirani	Ambystoma	Ambystomatidae	EN	Yes	19.5253	-99.436	2021	Field swab	Qiagen DNeasy Blood and Tissue Kit	qPCR	Negative	11	0.51	Moderate suitability
Ambystoma altamirani	Ambystoma	Ambystomatidae	EN	Yes	19.518	-99.4322	2021	Field swab	Qiagen DNeasy Blood and Tissue Kit	qPCR	Negative	11	0.51	Moderate suitability
Ambystoma altamirani	Ambystoma	Ambystomatidae	EN	Yes	19.518	-99.4322	2021	Field swab	Qiagen DNeasy Blood and Tissue Kit	qPCR	Negative	11	0.51	Moderate suitability
Ambystoma altamirani	Ambystoma	Ambystomatidae	EN	Yes	19.518	-99.4322	2021	Field swab	Qiagen DNeasy Blood and Tissue Kit	qPCR	Negative	11	0.51	Moderate suitability
Ambystoma altamirani	Ambystoma	Ambystomatidae	EN	Yes	19.518	-99.4322	2021	Field swab	Qiagen DNeasy Blood and Tissue Kit	qPCR	Negative	11	0.51	Moderate suitability
Ambystoma altamirani	Ambystoma	Ambystomatidae	EN	Yes	19.518	-99.4322	2021	Field swab	Qiagen DNeasy Blood and Tissue Kit	qPCR	Negative	11	0.51	Moderate suitability
Ambystoma altamirani	Ambystoma	Ambystomatidae	EN	Yes	19.518	-99.4322	2021	Field swab	Qiagen DNeasy Blood and Tissue Kit	qPCR	Negative	11	0.51	Moderate suitability
Ambystoma altamirani	Ambystoma	Ambystomatidae	EN	Yes	19.518	-99.4322	2021	Field swab	Qiagen DNeasy Blood and Tissue Kit	qPCR	Negative	11	0.51	Moderate suitability
Ambystoma altamirani	Ambystoma	Ambystomatidae	EN	Yes	19.518	-99.4322	2021	Field swab	Qiagen DNeasy Blood and Tissue Kit	qPCR	Negative	11	0.51	Moderate suitability
Ambystoma altamirani	Ambystoma	Ambystomatidae	EN	Yes	19.518	-99.4322	2021	Field swab	Qiagen DNeasy Blood and Tissue Kit	qPCR	Negative	11	0.51	Moderate suitability
Ambystoma altamirani	Ambystoma	Ambystomatidae	EN	Yes	19.518	-99.4322	2021	Field swab	Qiagen DNeasy Blood and Tissue Kit	qPCR	Negative	11	0.51	Moderate suitability
Ambystoma altamirani	Ambystoma	Ambystomatidae	EN	Yes	19.518	-99.4322	2021	Field swab	Qiagen DNeasy Blood and Tissue Kit	qPCR	Negative	11	0.51	Moderate suitability
Ambystoma altamirani	Ambystoma	Ambystomatidae	EN	Yes	19.518	-99.4322	2021	Field swab	Qiagen DNeasy Blood and Tissue Kit	qPCR	Negative	11	0.51	Moderate suitability
Ambystoma altamirani	Ambystoma	Ambystomatidae	EN	Yes	19.518	-99.4322	2021	Field swab	Qiagen DNeasy Blood and Tissue Kit	qPCR	Negative	11	0.51	Moderate suitability
Ambystoma altamirani	Ambystoma	Ambystomatidae	EN	Yes	19.518	-99.4322	2021	Field swab	Qiagen DNeasy Blood and Tissue Kit	qPCR	Negative	11	0.51	Moderate suitability
Ambystoma altamirani	Ambystoma	Ambystomatidae	EN	Yes	19.518	-99.4322	2021	Field swab	Qiagen DNeasy Blood and Tissue Kit	qPCR	Negative	11	0.51	Moderate suitability
Ambystoma altamirani	Ambystoma	Ambystomatidae	EN	Yes	19.518	-99.4322	2021	Field swab	Qiagen DNeasy Blood and Tissue Kit	qPCR	Negative	11	0.51	Moderate suitability
Ambystoma altamirani	Ambystoma	Ambystomatidae	EN	Yes	19.518	-99.4322	2021	Field swab	Qiagen DNeasy Blood and Tissue Kit	qPCR	Negative	11	0.51	Moderate suitability
Ambystoma altamirani	Ambystoma	Ambystomatidae	EN	Yes	19.518	-99.4322	2021	Field swab	Qiagen DNeasy Blood and Tissue Kit	qPCR	Negative	11	0.51	Moderate suitability
Ambystoma altamirani	Ambystoma	Ambystomatidae	EN	Yes	19.518	-99.4322	2021	Field swab	Qiagen DNeasy Blood and Tissue Kit	qPCR	Negative	11	0.51	Moderate suitability
Ambystoma altamirani	Ambystoma	Ambystomatidae	EN	Yes	19.518	-99.4322	2021	Field swab	Qiagen DNeasy Blood and Tissue Kit	qPCR	Negative	11	0.51	Moderate suitability
Ambystoma altamirani	Ambystoma	Ambystomatidae	EN	Yes	19.518	-99.4322	2021	Field swab	Qiagen DNeasy Blood and Tissue Kit	qPCR	Negative	11	0.51	Moderate suitability
Ambystoma altamirani	Ambystoma	Ambystomatidae	EN	Yes	19.7185	-99.5404	2021	Field swab	Qiagen DNeasy Blood and Tissue Kit	qPCR	Negative	9	0.33	Low suitability
Ambystoma altamirani	Ambystoma	Ambystomatidae	EN	Yes	19.7185	-99.5404	2021	Field swab	Qiagen DNeasy Blood and Tissue Kit	qPCR	Negative	9	0.33	Low suitability
Ambystoma altamirani	Ambystoma	Ambystomatidae	EN	Yes	19.7185	-99.5404	2021	Field swab	Qiagen DNeasy Blood and Tissue Kit	qPCR	Negative	9	0.33	Low suitability
Ambystoma altamirani	Ambystoma	Ambystomatidae	EN	Yes	19.7185	-99.5404	2021	Field swab	Qiagen DNeasy Blood and Tissue Kit	qPCR	Negative	9	0.33	Low suitability
Ambystoma altamirani	Ambystoma	Ambystomatidae	EN	Yes	19.7185	-99.5404	2021	Field swab	Qiagen DNeasy Blood and Tissue Kit	qPCR	Negative	9	0.33	Low suitability
Ambystoma altamirani	Ambystoma	Ambystomatidae	EN	Yes	19.7185	-99.5404	2021	Field swab	Qiagen DNeasy Blood and Tissue Kit	qPCR	Negative	9	0.33	Low suitability
Ambystoma altamirani	Ambystoma	Ambystomatidae	EN	Yes	19.7185	-99.5404	2021	Field swab	Qiagen DNeasy Blood and Tissue Kit	qPCR	Negative	9	0.33	Low suitability
Ambystoma altamirani	Ambystoma	Ambystomatidae	EN	Yes	19.7185	-99.5404	2021	Field swab	Qiagen DNeasy Blood and Tissue Kit	qPCR	Negative	9	0.33	Low suitability
Ambystoma altamirani	Ambystoma	Ambystomatidae	EN	Yes	19.7185	-99.5404	2021	Field swab	Qiagen DNeasy Blood and Tissue Kit	qPCR	Negative	9	0.33	Low suitability
Ambystoma altamirani	Ambystoma	Ambystomatidae	EN	Yes	19.7185	-99.5404	2021	Field swab	Qiagen DNeasy Blood and Tissue Kit	qPCR	Negative	9	0.33	Low suitability
Ambystoma altamirani	Ambystoma	Ambystomatidae	EN	Yes	19.7185	-99.5404	2021	Field swab	Qiagen DNeasy Blood and Tissue Kit	qPCR	Negative	9	0.33	Low suitability
Ambystoma altamirani	Ambystoma	Ambystomatidae	EN	Yes	19.7185	-99.5404	2021	Field swab	Qiagen DNeasy Blood and Tissue Kit	qPCR	Negative	9	0.33	Low suitability
Ambystoma altamirani	Ambystoma	Ambystomatidae	EN	Yes	19.7185	-99.5404	2021	Field swab	Qiagen DNeasy Blood and Tissue Kit	qPCR	Negative	9	0.33	Low suitability
Ambystoma altamirani	Ambystoma	Ambystomatidae	EN	Yes	19.7185	-99.5404	2021	Field swab	Qiagen DNeasy Blood and Tissue Kit	qPCR	Negative	9	0.33	Low suitability
Ambystoma altamirani	Ambystoma	Ambystomatidae	EN	Yes	19.7185	-99.5404	2021	Field swab	Qiagen DNeasy Blood and Tissue Kit	qPCR	Negative	9	0.33	Low suitability
Ambystoma altamirani	Ambystoma	Ambystomatidae	EN	Yes	19.7185	-99.5404	2021	Field swab	Qiagen DNeasy Blood and Tissue Kit	qPCR	Negative	9	0.33	Low suitability
Ambystoma altamirani	Ambystoma	Ambystomatidae	EN	Yes	19.7185	-99.5404	2021	Field swab	Qiagen DNeasy Blood and Tissue Kit	qPCR	Negative	9	0.33	Low suitability
Ambystoma altamirani	Ambystoma	Ambystomatidae	EN	Yes	19.7185	-99.5404	2021	Field swab	Qiagen DNeasy Blood and Tissue Kit	qPCR	Negative	9	0.33	Low suitability
Ambystoma altamirani	Ambystoma	Ambystomatidae	EN	Yes	19.7185	-99.5404	2021	Field swab	Qiagen DNeasy Blood and Tissue Kit	qPCR	Negative	9	0.33	Low suitability
Ambystoma altamirani	Ambystoma	Ambystomatidae	EN	Yes	19.7185	-99.5404	2021	Field swab	Qiagen DNeasy Blood and Tissue Kit	qPCR	Negative	9	0.33	Low suitability
Ambystoma altamirani	Ambystoma	Ambystomatidae	EN	Yes	19.7185	-99.5404	2021	Field swab	Qiagen DNeasy Blood and Tissue Kit	qPCR	Negative	9	0.33	Low suitability
Ambystoma altamirani	Ambystoma	Ambystomatidae	EN	Yes	19.5683	-99.5	2021	Field swab	Qiagen DNeasy Blood and Tissue Kit	qPCR	Negative	11	0.61	Moderate suitability
Ambystoma altamirani	Ambystoma	Ambystomatidae	EN	Yes	19.5683	-99.5	2021	Field swab	Qiagen DNeasy Blood and Tissue Kit	qPCR	Negative	11	0.61	Moderate suitability
Ambystoma altamirani	Ambystoma	Ambystomatidae	EN	Yes	19.5683	-99.5	2021	Field swab	Qiagen DNeasy Blood and Tissue Kit	qPCR	Negative	11	0.61	Moderate suitability
Ambystoma andersoni	Ambystoma	Ambystomatidae	CR	Yes	19.8223	-101.788	2021	Field swab	Qiagen DNeasy Blood and Tissue Kit	qPCR	Negative	13	0.05	Not suitable
Ambystoma andersoni	Ambystoma	Ambystomatidae	CR	Yes	19.8223	-101.788	2021	Field swab	Qiagen DNeasy Blood and Tissue Kit	qPCR	Negative	13	0.05	Not suitable
Ambystoma andersoni	Ambystoma	Ambystomatidae	CR	Yes	19.8223	-101.788	2021	Field swab	Qiagen DNeasy Blood and Tissue Kit	qPCR	Negative	13	0.05	Not suitable
Ambystoma andersoni	Ambystoma	Ambystomatidae	CR	Yes	19.8223	-101.788	2021	Field swab	Qiagen DNeasy Blood and Tissue Kit	qPCR	Negative	13	0.05	Not suitable
Ambystoma andersoni	Ambystoma	Ambystomatidae	CR	Yes	19.8223	-101.788	2021	Field swab	Qiagen DNeasy Blood and Tissue Kit	qPCR	Negative	13	0.05	Not suitable
Ambystoma andersoni	Ambystoma	Ambystomatidae	CR	Yes	19.8223	-101.788	2021	Field swab	Qiagen DNeasy Blood and Tissue Kit	qPCR	Negative	13	0.05	Not suitable
Ambystoma andersoni	Ambystoma	Ambystomatidae	CR	Yes	19.8223	-101.788	2021	Field swab	Qiagen DNeasy Blood and Tissue Kit	qPCR	Negative	13	0.05	Not suitable
Ambystoma andersoni	Ambystoma	Ambystomatidae	CR	Yes	19.8223	-101.788	2021	Field swab	Qiagen DNeasy Blood and Tissue Kit	qPCR	Negative	13	0.05	Not suitable
Ambystoma andersoni	Ambystoma	Ambystomatidae	CR	Yes	19.8223	-101.788	2021	Field swab	Qiagen DNeasy Blood and Tissue Kit	qPCR	Negative	13	0.05	Not suitable
Ambystoma andersoni	Ambystoma	Ambystomatidae	CR	Yes	19.8223	-101.788	2021	Field swab	Qiagen DNeasy Blood and Tissue Kit	qPCR	Negative	13	0.05	Not suitable
Ambystoma andersoni	Ambystoma	Ambystomatidae	CR	Yes	19.8223	-101.788	2021	Field swab	Qiagen DNeasy Blood and Tissue Kit	qPCR	Negative	13	0.05	Not suitable
Ambystoma andersoni	Ambystoma	Ambystomatidae	CR	Yes	19.8223	-101.788	2021	Field swab	Qiagen DNeasy Blood and Tissue Kit	qPCR	Negative	13	0.05	Not suitable
Ambystoma andersoni	Ambystoma	Ambystomatidae	CR	Yes	19.8223	-101.788	2021	Field swab	Qiagen DNeasy Blood and Tissue Kit	qPCR	Negative	13	0.05	Not suitable
Ambystoma andersoni	Ambystoma	Ambystomatidae	CR	Yes	19.8223	-101.788	2021	Field swab	Qiagen DNeasy Blood and Tissue Kit	qPCR	Negative	13	0.05	Not suitable
Ambystoma andersoni	Ambystoma	Ambystomatidae	CR	Yes	19.8223	-101.788	2021	Field swab	Qiagen DNeasy Blood and Tissue Kit	qPCR	Negative	13	0.05	Not suitable
Ambystoma andersoni	Ambystoma	Ambystomatidae	CR	Yes	19.8223	-101.788	2021	Field swab	Qiagen DNeasy Blood and Tissue Kit	qPCR	Negative	13	0.05	Not suitable
Ambystoma andersoni	Ambystoma	Ambystomatidae	CR	Yes	19.8223	-101.788	2021	Field swab	Qiagen DNeasy Blood and Tissue Kit	qPCR	Negative	13	0.05	Not suitable
Ambystoma andersoni	Ambystoma	Ambystomatidae	CR	Yes	19.8223	-101.788	2021	Field swab	Qiagen DNeasy Blood and Tissue Kit	qPCR	Negative	13	0.05	Not suitable
Ambystoma andersoni	Ambystoma	Ambystomatidae	CR	Yes	19.8223	-101.788	2021	Field swab	Qiagen DNeasy Blood and Tissue Kit	qPCR	Negative	13	0.05	Not suitable
Ambystoma andersoni	Ambystoma	Ambystomatidae	CR	Yes	19.8223	-101.788	2021	Field swab	Qiagen DNeasy Blood and Tissue Kit	qPCR	Negative	13	0.05	Not suitable
Ambystoma andersoni	Ambystoma	Ambystomatidae	CR	Yes	19.8223	-101.788	2021	Field swab	Qiagen DNeasy Blood and Tissue Kit	qPCR	Negative	13	0.05	Not suitable
Ambystoma andersoni	Ambystoma	Ambystomatidae	CR	Yes	19.8223	-101.788	2021	Field swab	Qiagen DNeasy Blood and Tissue Kit	qPCR	Negative	13	0.05	Not suitable
Ambystoma andersoni	Ambystoma	Ambystomatidae	CR	Yes	19.8223	-101.788	2021	Field swab	Qiagen DNeasy Blood and Tissue Kit	qPCR	Negative	13	0.05	Not suitable
Ambystoma andersoni	Ambystoma	Ambystomatidae	CR	Yes	19.8223	-101.788	2021	Field swab	Qiagen DNeasy Blood and Tissue Kit	qPCR	Negative	13	0.05	Not suitable
Ambystoma andersoni	Ambystoma	Ambystomatidae	CR	Yes	19.8223	-101.788	2021	Field swab	Qiagen DNeasy Blood and Tissue Kit	qPCR	Negative	13	0.05	Not suitable
Ambystoma andersoni	Ambystoma	Ambystomatidae	CR	Yes	19.8223	-101.788	2021	Field swab	Qiagen DNeasy Blood and Tissue Kit	qPCR	Negative	13	0.05	Not suitable
Ambystoma andersoni	Ambystoma	Ambystomatidae	CR	Yes	19.8223	-101.788	2021	Field swab	Qiagen DNeasy Blood and Tissue Kit	qPCR	Negative	13	0.05	Not suitable
Ambystoma andersoni	Ambystoma	Ambystomatidae	CR	Yes	19.8223	-101.788	2021	Field swab	Qiagen DNeasy Blood and Tissue Kit	qPCR	Negative	13	0.05	Not suitable
Ambystoma andersoni	Ambystoma	Ambystomatidae	CR	Yes	19.8223	-101.788	2021	Field swab	Qiagen DNeasy Blood and Tissue Kit	qPCR	Negative	13	0.05	Not suitable
Ambystoma andersoni	Ambystoma	Ambystomatidae	CR	Yes	19.8223	-101.788	2021	Field swab	Qiagen DNeasy Blood and Tissue Kit	qPCR	Negative	13	0.05	Not suitable
Ambystoma dumerilii	Ambystoma	Ambystomatidae	CR	Yes	19.5567	-101.648	2021	Field swab	Qiagen DNeasy Blood and Tissue Kit	qPCR	Negative	16	0.06	Not suitable
Ambystoma dumerilii	Ambystoma	Ambystomatidae	CR	Yes	19.5567	-101.648	2021	Field swab	Qiagen DNeasy Blood and Tissue Kit	qPCR	Negative	16	0.06	Not suitable
Ambystoma dumerilii	Ambystoma	Ambystomatidae	CR	Yes	19.5567	-101.648	2021	Field swab	Qiagen DNeasy Blood and Tissue Kit	qPCR	Negative	16	0.06	Not suitable
Ambystoma dumerilii	Ambystoma	Ambystomatidae	CR	Yes	19.5567	-101.648	2021	Field swab	Qiagen DNeasy Blood and Tissue Kit	qPCR	Negative	16	0.06	Not suitable
Ambystoma dumerilii	Ambystoma	Ambystomatidae	CR	Yes	19.5567	-101.648	2021	Field swab	Qiagen DNeasy Blood and Tissue Kit	qPCR	Negative	16	0.06	Not suitable
Ambystoma dumerilii	Ambystoma	Ambystomatidae	CR	Yes	19.5567	-101.648	2021	Field swab	Qiagen DNeasy Blood and Tissue Kit	qPCR	Negative	16	0.06	Not suitable
Ambystoma dumerilii	Ambystoma	Ambystomatidae	CR	Yes	19.5567	-101.648	2021	Field swab	Qiagen DNeasy Blood and Tissue Kit	qPCR	Negative	16	0.06	Not suitable
Ambystoma dumerilii	Ambystoma	Ambystomatidae	CR	Yes	19.5567	-101.648	2021	Field swab	Qiagen DNeasy Blood and Tissue Kit	qPCR	Negative	16	0.06	Not suitable
Ambystoma dumerilii	Ambystoma	Ambystomatidae	CR	Yes	19.5567	-101.648	2021	Field swab	Qiagen DNeasy Blood and Tissue Kit	qPCR	Negative	16	0.06	Not suitable
Ambystoma dumerilii	Ambystoma	Ambystomatidae	CR	Yes	19.5567	-101.648	2021	Field swab	Qiagen DNeasy Blood and Tissue Kit	qPCR	Negative	16	0.06	Not suitable
Ambystoma dumerilii	Ambystoma	Ambystomatidae	CR	Yes	19.5567	-101.648	2021	Field swab	Qiagen DNeasy Blood and Tissue Kit	qPCR	Negative	16	0.06	Not suitable
Ambystoma dumerilii	Ambystoma	Ambystomatidae	CR	Yes	19.5567	-101.648	2021	Field swab	Qiagen DNeasy Blood and Tissue Kit	qPCR	Negative	16	0.06	Not suitable
Ambystoma dumerilii	Ambystoma	Ambystomatidae	CR	Yes	19.5567	-101.648	2021	Field swab	Qiagen DNeasy Blood and Tissue Kit	qPCR	Negative	16	0.06	Not suitable
Ambystoma dumerilii	Ambystoma	Ambystomatidae	CR	Yes	19.5567	-101.648	2021	Field swab	Qiagen DNeasy Blood and Tissue Kit	qPCR	Negative	16	0.06	Not suitable
Ambystoma dumerilii	Ambystoma	Ambystomatidae	CR	Yes	19.5567	-101.648	2021	Field swab	Qiagen DNeasy Blood and Tissue Kit	qPCR	Negative	16	0.06	Not suitable
Ambystoma dumerilii	Ambystoma	Ambystomatidae	CR	Yes	19.5567	-101.648	2021	Field swab	Qiagen DNeasy Blood and Tissue Kit	qPCR	Negative	16	0.06	Not suitable
Ambystoma flavipiperatum	Ambystoma	Ambystomatidae	EN	Yes	20.3008	-104.035	2016	Field swab	Prepman Ultra	qPCR	Negative	19	0.16	Not suitable
Ambystoma granulosum	Ambystoma	Ambystomatidae	EN	Yes	19.2114	-99.9888	2021	Field swab	Qiagen DNeasy Blood and Tissue Kit	qPCR	Negative	16	0.42	Low suitability
Ambystoma granulosum	Ambystoma	Ambystomatidae	EN	Yes	19.2114	-99.9888	2021	Field swab	Qiagen DNeasy Blood and Tissue Kit	qPCR	Negative	16	0.42	Low suitability
Ambystoma granulosum	Ambystoma	Ambystomatidae	EN	Yes	19.2114	-99.9888	2021	Field swab	Qiagen DNeasy Blood and Tissue Kit	qPCR	Negative	16	0.42	Low suitability
Ambystoma granulosum	Ambystoma	Ambystomatidae	EN	Yes	19.2114	-99.9888	2021	Field swab	Qiagen DNeasy Blood and Tissue Kit	qPCR	Negative	16	0.42	Low suitability
Ambystoma granulosum	Ambystoma	Ambystomatidae	EN	Yes	19.2114	-99.9888	2021	Field swab	Qiagen DNeasy Blood and Tissue Kit	qPCR	Negative	16	0.42	Low suitability
Ambystoma granulosum	Ambystoma	Ambystomatidae	EN	Yes	19.2114	-99.9888	2021	Field swab	Qiagen DNeasy Blood and Tissue Kit	qPCR	Negative	16	0.42	Low suitability
Ambystoma granulosum	Ambystoma	Ambystomatidae	EN	Yes	19.2114	-99.9888	2021	Field swab	Qiagen DNeasy Blood and Tissue Kit	qPCR	Negative	16	0.42	Low suitability
Ambystoma granulosum	Ambystoma	Ambystomatidae	EN	Yes	19.2114	-99.9888	2021	Field swab	Qiagen DNeasy Blood and Tissue Kit	qPCR	Negative	16	0.42	Low suitability
Ambystoma granulosum	Ambystoma	Ambystomatidae	EN	Yes	19.2114	-99.9888	2021	Field swab	Qiagen DNeasy Blood and Tissue Kit	qPCR	Negative	16	0.42	Low suitability
Ambystoma granulosum	Ambystoma	Ambystomatidae	EN	Yes	19.2114	-99.9888	2021	Field swab	Qiagen DNeasy Blood and Tissue Kit	qPCR	Negative	16	0.42	Low suitability
Ambystoma granulosum	Ambystoma	Ambystomatidae	EN	Yes	19.2114	-99.9888	2021	Field swab	Qiagen DNeasy Blood and Tissue Kit	qPCR	Negative	16	0.42	Low suitability
Ambystoma granulosum	Ambystoma	Ambystomatidae	EN	Yes	19.2114	-99.9888	2021	Field swab	Qiagen DNeasy Blood and Tissue Kit	qPCR	Negative	16	0.42	Low suitability
Ambystoma granulosum	Ambystoma	Ambystomatidae	EN	Yes	19.2114	-99.9888	2021	Field swab	Qiagen DNeasy Blood and Tissue Kit	qPCR	Negative	16	0.42	Low suitability
Ambystoma granulosum	Ambystoma	Ambystomatidae	EN	Yes	19.2114	-99.9888	2021	Field swab	Qiagen DNeasy Blood and Tissue Kit	qPCR	Negative	16	0.42	Low suitability
Ambystoma granulosum	Ambystoma	Ambystomatidae	EN	Yes	19.2114	-99.9888	2021	Field swab	Qiagen DNeasy Blood and Tissue Kit	qPCR	Negative	16	0.42	Low suitability
Ambystoma granulosum	Ambystoma	Ambystomatidae	EN	Yes	19.2114	-99.9888	2021	Field swab	Qiagen DNeasy Blood and Tissue Kit	qPCR	Negative	16	0.42	Low suitability
Ambystoma granulosum	Ambystoma	Ambystomatidae	EN	Yes	19.2114	-99.9888	2021	Field swab	Qiagen DNeasy Blood and Tissue Kit	qPCR	Negative	16	0.42	Low suitability
Ambystoma granulosum	Ambystoma	Ambystomatidae	EN	Yes	19.1856	-99.9758	2021	Field swab	Qiagen DNeasy Blood and Tissue Kit	qPCR	Negative	16	0.52	Moderate suitability
Ambystoma granulosum	Ambystoma	Ambystomatidae	EN	Yes	19.1856	-99.9758	2021	Field swab	Qiagen DNeasy Blood and Tissue Kit	qPCR	Negative	16	0.52	Moderate suitability
Ambystoma granulosum	Ambystoma	Ambystomatidae	EN	Yes	19.1856	-99.9758	2021	Field swab	Qiagen DNeasy Blood and Tissue Kit	qPCR	Negative	16	0.52	Moderate suitability
Ambystoma granulosum	Ambystoma	Ambystomatidae	EN	Yes	19.1856	-99.9758	2021	Field swab	Qiagen DNeasy Blood and Tissue Kit	qPCR	Negative	16	0.52	Moderate suitability
Ambystoma granulosum	Ambystoma	Ambystomatidae	EN	Yes	19.1856	-99.9758	2021	Field swab	Qiagen DNeasy Blood and Tissue Kit	qPCR	Negative	16	0.52	Moderate suitability
Ambystoma granulosum	Ambystoma	Ambystomatidae	EN	Yes	19.1856	-99.9758	2021	Field swab	Qiagen DNeasy Blood and Tissue Kit	qPCR	Negative	16	0.52	Moderate suitability
Ambystoma granulosum	Ambystoma	Ambystomatidae	EN	Yes	19.1856	-99.9758	2021	Field swab	Qiagen DNeasy Blood and Tissue Kit	qPCR	Negative	16	0.52	Moderate suitability
Ambystoma granulosum	Ambystoma	Ambystomatidae	EN	Yes	19.1856	-99.9758	2021	Field swab	Qiagen DNeasy Blood and Tissue Kit	qPCR	Negative	16	0.52	Moderate suitability
Ambystoma granulosum	Ambystoma	Ambystomatidae	EN	Yes	19.1856	-99.9758	2021	Field swab	Qiagen DNeasy Blood and Tissue Kit	qPCR	Negative	16	0.52	Moderate suitability
Ambystoma granulosum	Ambystoma	Ambystomatidae	EN	Yes	19.1856	-99.9758	2021	Field swab	Qiagen DNeasy Blood and Tissue Kit	qPCR	Negative	16	0.52	Moderate suitability
Ambystoma granulosum	Ambystoma	Ambystomatidae	EN	Yes	19.1856	-99.9758	2021	Field swab	Qiagen DNeasy Blood and Tissue Kit	qPCR	Negative	16	0.52	Moderate suitability
Ambystoma granulosum	Ambystoma	Ambystomatidae	EN	Yes	19.1856	-99.9758	2021	Field swab	Qiagen DNeasy Blood and Tissue Kit	qPCR	Negative	16	0.52	Moderate suitability
Ambystoma granulosum	Ambystoma	Ambystomatidae	EN	Yes	19.1856	-99.9758	2021	Field swab	Qiagen DNeasy Blood and Tissue Kit	qPCR	Negative	16	0.52	Moderate suitability
Ambystoma granulosum	Ambystoma	Ambystomatidae	EN	Yes	19.1856	-99.9758	2021	Field swab	Qiagen DNeasy Blood and Tissue Kit	qPCR	Negative	16	0.52	Moderate suitability
Ambystoma granulosum	Ambystoma	Ambystomatidae	EN	Yes	19.1856	-99.9758	2021	Field swab	Qiagen DNeasy Blood and Tissue Kit	qPCR	Negative	16	0.52	Moderate suitability
Ambystoma granulosum	Ambystoma	Ambystomatidae	EN	Yes	19.1856	-99.9758	2021	Field swab	Qiagen DNeasy Blood and Tissue Kit	qPCR	Negative	16	0.52	Moderate suitability
Ambystoma granulosum	Ambystoma	Ambystomatidae	EN	Yes	19.1856	-99.9758	2021	Field swab	Qiagen DNeasy Blood and Tissue Kit	qPCR	Negative	16	0.52	Moderate suitability
Ambystoma granulosum	Ambystoma	Ambystomatidae	EN	Yes	19.1856	-99.9758	2021	Field swab	Qiagen DNeasy Blood and Tissue Kit	qPCR	Negative	16	0.52	Moderate suitability
Ambystoma granulosum	Ambystoma	Ambystomatidae	EN	Yes	19.1856	-99.9758	2021	Field swab	Qiagen DNeasy Blood and Tissue Kit	qPCR	Negative	16	0.52	Moderate suitability
Ambystoma granulosum	Ambystoma	Ambystomatidae	EN	Yes	19.1856	-99.9758	2021	Field swab	Qiagen DNeasy Blood and Tissue Kit	qPCR	Negative	16	0.52	Moderate suitability
Ambystoma granulosum	Ambystoma	Ambystomatidae	EN	Yes	19.9759	-99.7045	2021	Field swab	Qiagen DNeasy Blood and Tissue Kit	qPCR	Negative	11	0.22	Not suitable
Ambystoma mexicanum	Ambystoma	Ambystomatidae	CR	Yes	19.2821	-99.1031	2021	Field swab	Qiagen DNeasy Blood and Tissue Kit	qPCR	Negative	12	0.12	Not suitable
Ambystoma mexicanum	Ambystoma	Ambystomatidae	CR	Yes	19.2821	-99.1031	2021	Field swab	Qiagen DNeasy Blood and Tissue Kit	qPCR	Negative	12	0.12	Not suitable
Ambystoma mexicanum	Ambystoma	Ambystomatidae	CR	Yes	19.2821	-99.1031	2021	Field swab	Qiagen DNeasy Blood and Tissue Kit	qPCR	Negative	12	0.12	Not suitable
Ambystoma mexicanum	Ambystoma	Ambystomatidae	CR	Yes	19.2821	-99.1031	2021	Field swab	Qiagen DNeasy Blood and Tissue Kit	qPCR	Negative	12	0.12	Not suitable
Ambystoma mexicanum	Ambystoma	Ambystomatidae	CR	Yes	19.2821	-99.1031	2021	Field swab	Qiagen DNeasy Blood and Tissue Kit	qPCR	Negative	12	0.12	Not suitable
Ambystoma mexicanum	Ambystoma	Ambystomatidae	CR	Yes	19.2821	-99.1031	2021	Field swab	Qiagen DNeasy Blood and Tissue Kit	qPCR	Negative	12	0.12	Not suitable
Ambystoma mexicanum	Ambystoma	Ambystomatidae	CR	Yes	19.2821	-99.1031	2021	Field swab	Qiagen DNeasy Blood and Tissue Kit	qPCR	Negative	12	0.12	Not suitable
Ambystoma mexicanum	Ambystoma	Ambystomatidae	CR	Yes	19.2821	-99.1031	2021	Field swab	Qiagen DNeasy Blood and Tissue Kit	qPCR	Negative	12	0.12	Not suitable
Ambystoma mexicanum	Ambystoma	Ambystomatidae	CR	Yes	19.2821	-99.1031	2021	Field swab	Qiagen DNeasy Blood and Tissue Kit	qPCR	Negative	12	0.12	Not suitable
Ambystoma mexicanum	Ambystoma	Ambystomatidae	CR	Yes	19.2821	-99.1031	2021	Field swab	Qiagen DNeasy Blood and Tissue Kit	qPCR	Negative	12	0.12	Not suitable
Ambystoma mexicanum	Ambystoma	Ambystomatidae	CR	Yes	19.2821	-99.1031	2021	Field swab	Qiagen DNeasy Blood and Tissue Kit	qPCR	Negative	12	0.12	Not suitable
Ambystoma mexicanum	Ambystoma	Ambystomatidae	CR	Yes	19.2821	-99.1031	2021	Field swab	Qiagen DNeasy Blood and Tissue Kit	qPCR	Negative	12	0.12	Not suitable
Ambystoma mexicanum	Ambystoma	Ambystomatidae	CR	Yes	19.2821	-99.1031	2021	Field swab	Qiagen DNeasy Blood and Tissue Kit	qPCR	Negative	12	0.12	Not suitable
Ambystoma mexicanum	Ambystoma	Ambystomatidae	CR	Yes	19.2821	-99.1031	2021	Field swab	Qiagen DNeasy Blood and Tissue Kit	qPCR	Negative	12	0.12	Not suitable
Ambystoma mexicanum	Ambystoma	Ambystomatidae	CR	Yes	19.2821	-99.1031	2021	Field swab	Qiagen DNeasy Blood and Tissue Kit	qPCR	Negative	12	0.12	Not suitable
Ambystoma mexicanum	Ambystoma	Ambystomatidae	CR	Yes	19.2821	-99.1031	2021	Field swab	Qiagen DNeasy Blood and Tissue Kit	qPCR	Negative	12	0.12	Not suitable
Ambystoma mexicanum	Ambystoma	Ambystomatidae	CR	Yes	19.2821	-99.1031	2021	Field swab	Qiagen DNeasy Blood and Tissue Kit	qPCR	Negative	12	0.12	Not suitable
Ambystoma mexicanum	Ambystoma	Ambystomatidae	CR	Yes	19.2821	-99.1031	2021	Field swab	Qiagen DNeasy Blood and Tissue Kit	qPCR	Negative	12	0.12	Not suitable
Ambystoma mexicanum	Ambystoma	Ambystomatidae	CR	Yes	19.2821	-99.1031	2021	Field swab	Qiagen DNeasy Blood and Tissue Kit	qPCR	Negative	12	0.12	Not suitable
Ambystoma mexicanum	Ambystoma	Ambystomatidae	CR	Yes	19.2821	-99.1031	2021	Field swab	Qiagen DNeasy Blood and Tissue Kit	qPCR	Negative	12	0.12	Not suitable
Ambystoma mexicanum	Ambystoma	Ambystomatidae	CR	Yes	19.2821	-99.1031	2021	Field swab	Qiagen DNeasy Blood and Tissue Kit	qPCR	Negative	12	0.12	Not suitable
Ambystoma mexicanum	Ambystoma	Ambystomatidae	CR	Yes	19.2821	-99.1031	2021	Field swab	Qiagen DNeasy Blood and Tissue Kit	qPCR	Negative	12	0.12	Not suitable
Ambystoma mexicanum	Ambystoma	Ambystomatidae	CR	Yes	19.2821	-99.1031	2021	Field swab	Qiagen DNeasy Blood and Tissue Kit	qPCR	Negative	12	0.12	Not suitable
Ambystoma mexicanum	Ambystoma	Ambystomatidae	CR	Yes	19.2821	-99.1031	2021	Field swab	Qiagen DNeasy Blood and Tissue Kit	qPCR	Negative	12	0.12	Not suitable
Ambystoma mexicanum	Ambystoma	Ambystomatidae	CR	Yes	19.2821	-99.1031	2021	Field swab	Qiagen DNeasy Blood and Tissue Kit	qPCR	Negative	12	0.12	Not suitable
Ambystoma mexicanum	Ambystoma	Ambystomatidae	CR	Yes	19.2821	-99.1031	2021	Field swab	Qiagen DNeasy Blood and Tissue Kit	qPCR	Negative	12	0.12	Not suitable
Ambystoma mexicanum	Ambystoma	Ambystomatidae	CR	Yes	19.2821	-99.1031	2021	Field swab	Qiagen DNeasy Blood and Tissue Kit	qPCR	Negative	12	0.12	Not suitable
Ambystoma ordinarium	Ambystoma	Ambystomatidae	EN	Yes	19.61	-101.124	2021	Field swab	Qiagen DNeasy Blood and Tissue Kit	qPCR	Negative	18	0.16	Not suitable
Ambystoma ordinarium	Ambystoma	Ambystomatidae	EN	Yes	19.61	-101.124	2021	Field swab	Qiagen DNeasy Blood and Tissue Kit	qPCR	Negative	18	0.16	Not suitable
Ambystoma ordinarium	Ambystoma	Ambystomatidae	EN	Yes	19.61	-101.124	2021	Field swab	Qiagen DNeasy Blood and Tissue Kit	qPCR	Negative	18	0.16	Not suitable
Ambystoma ordinarium	Ambystoma	Ambystomatidae	EN	Yes	19.61	-101.124	2021	Field swab	Qiagen DNeasy Blood and Tissue Kit	qPCR	Negative	18	0.16	Not suitable
Ambystoma ordinarium	Ambystoma	Ambystomatidae	EN	Yes	19.61	-101.124	2021	Field swab	Qiagen DNeasy Blood and Tissue Kit	qPCR	Negative	18	0.16	Not suitable
Ambystoma ordinarium	Ambystoma	Ambystomatidae	EN	Yes	19.61	-101.124	2021	Field swab	Qiagen DNeasy Blood and Tissue Kit	qPCR	Negative	18	0.16	Not suitable
Ambystoma ordinarium	Ambystoma	Ambystomatidae	EN	Yes	19.61	-101.124	2021	Field swab	Qiagen DNeasy Blood and Tissue Kit	qPCR	Negative	18	0.16	Not suitable
Ambystoma ordinarium	Ambystoma	Ambystomatidae	EN	Yes	19.61	-101.124	2021	Field swab	Qiagen DNeasy Blood and Tissue Kit	qPCR	Negative	18	0.16	Not suitable
Ambystoma ordinarium	Ambystoma	Ambystomatidae	EN	Yes	19.61	-101.124	2021	Field swab	Qiagen DNeasy Blood and Tissue Kit	qPCR	Negative	18	0.16	Not suitable
Ambystoma ordinarium	Ambystoma	Ambystomatidae	EN	Yes	19.61	-101.124	2021	Field swab	Qiagen DNeasy Blood and Tissue Kit	qPCR	Negative	18	0.16	Not suitable
Ambystoma ordinarium	Ambystoma	Ambystomatidae	EN	Yes	19.61	-101.124	2021	Field swab	Qiagen DNeasy Blood and Tissue Kit	qPCR	Negative	18	0.16	Not suitable
Ambystoma ordinarium	Ambystoma	Ambystomatidae	EN	Yes	19.61	-101.124	2021	Field swab	Qiagen DNeasy Blood and Tissue Kit	qPCR	Negative	18	0.16	Not suitable
Ambystoma ordinarium	Ambystoma	Ambystomatidae	EN	Yes	19.61	-101.124	2021	Field swab	Qiagen DNeasy Blood and Tissue Kit	qPCR	Negative	18	0.16	Not suitable
Ambystoma ordinarium	Ambystoma	Ambystomatidae	EN	Yes	19.61	-101.124	2021	Field swab	Qiagen DNeasy Blood and Tissue Kit	qPCR	Negative	18	0.16	Not suitable
Ambystoma ordinarium	Ambystoma	Ambystomatidae	EN	Yes	19.61	-101.124	2021	Field swab	Qiagen DNeasy Blood and Tissue Kit	qPCR	Negative	18	0.16	Not suitable
Ambystoma ordinarium	Ambystoma	Ambystomatidae	EN	Yes	19.61	-101.124	2021	Field swab	Qiagen DNeasy Blood and Tissue Kit	qPCR	Negative	18	0.16	Not suitable
Ambystoma ordinarium	Ambystoma	Ambystomatidae	EN	Yes	19.61	-101.124	2021	Field swab	Qiagen DNeasy Blood and Tissue Kit	qPCR	Negative	18	0.16	Not suitable
Ambystoma ordinarium	Ambystoma	Ambystomatidae	EN	Yes	19.61	-101.124	2021	Field swab	Qiagen DNeasy Blood and Tissue Kit	qPCR	Negative	18	0.16	Not suitable
Ambystoma ordinarium	Ambystoma	Ambystomatidae	EN	Yes	19.61	-101.124	2021	Field swab	Qiagen DNeasy Blood and Tissue Kit	qPCR	Negative	18	0.16	Not suitable
Ambystoma ordinarium	Ambystoma	Ambystomatidae	EN	Yes	19.61	-101.124	2021	Field swab	Qiagen DNeasy Blood and Tissue Kit	qPCR	Negative	18	0.16	Not suitable
Ambystoma ordinarium	Ambystoma	Ambystomatidae	EN	Yes	19.6703	-101.145	2021	Field swab	Qiagen DNeasy Blood and Tissue Kit	qPCR	Negative	18	0.08	Not suitable
Ambystoma ordinarium	Ambystoma	Ambystomatidae	EN	Yes	19.6703	-101.145	2021	Field swab	Qiagen DNeasy Blood and Tissue Kit	qPCR	Negative	18	0.08	Not suitable
Ambystoma ordinarium	Ambystoma	Ambystomatidae	EN	Yes	19.6703	-101.145	2021	Field swab	Qiagen DNeasy Blood and Tissue Kit	qPCR	Negative	18	0.08	Not suitable
Ambystoma ordinarium	Ambystoma	Ambystomatidae	EN	Yes	19.6703	-101.145	2021	Field swab	Qiagen DNeasy Blood and Tissue Kit	qPCR	Negative	18	0.08	Not suitable
Ambystoma ordinarium	Ambystoma	Ambystomatidae	EN	Yes	19.6703	-101.145	2021	Field swab	Qiagen DNeasy Blood and Tissue Kit	qPCR	Negative	18	0.08	Not suitable
Ambystoma ordinarium	Ambystoma	Ambystomatidae	EN	Yes	19.6703	-101.145	2021	Field swab	Qiagen DNeasy Blood and Tissue Kit	qPCR	Negative	18	0.08	Not suitable
Ambystoma ordinarium	Ambystoma	Ambystomatidae	EN	Yes	19.6703	-101.145	2021	Field swab	Qiagen DNeasy Blood and Tissue Kit	qPCR	Negative	18	0.08	Not suitable
Ambystoma ordinarium	Ambystoma	Ambystomatidae	EN	Yes	19.6703	-101.145	2021	Field swab	Qiagen DNeasy Blood and Tissue Kit	qPCR	Negative	18	0.08	Not suitable
Ambystoma ordinarium	Ambystoma	Ambystomatidae	EN	Yes	19.6703	-101.145	2021	Field swab	Qiagen DNeasy Blood and Tissue Kit	qPCR	Negative	18	0.08	Not suitable
Ambystoma ordinarium	Ambystoma	Ambystomatidae	EN	Yes	19.6703	-101.145	2021	Field swab	Qiagen DNeasy Blood and Tissue Kit	qPCR	Negative	18	0.08	Not suitable
Ambystoma ordinarium	Ambystoma	Ambystomatidae	EN	Yes	19.6703	-101.145	2021	Field swab	Qiagen DNeasy Blood and Tissue Kit	qPCR	Negative	18	0.08	Not suitable
Ambystoma ordinarium	Ambystoma	Ambystomatidae	EN	Yes	19.6703	-101.145	2021	Field swab	Qiagen DNeasy Blood and Tissue Kit	qPCR	Negative	18	0.08	Not suitable
Ambystoma ordinarium	Ambystoma	Ambystomatidae	EN	Yes	19.6703	-101.145	2021	Field swab	Qiagen DNeasy Blood and Tissue Kit	qPCR	Negative	18	0.08	Not suitable
Ambystoma ordinarium	Ambystoma	Ambystomatidae	EN	Yes	19.6703	-101.145	2021	Field swab	Qiagen DNeasy Blood and Tissue Kit	qPCR	Negative	18	0.08	Not suitable
Ambystoma ordinarium	Ambystoma	Ambystomatidae	EN	Yes	19.6703	-101.145	2021	Field swab	Qiagen DNeasy Blood and Tissue Kit	qPCR	Negative	18	0.08	Not suitable
Ambystoma ordinarium	Ambystoma	Ambystomatidae	EN	Yes	19.6703	-101.145	2021	Field swab	Qiagen DNeasy Blood and Tissue Kit	qPCR	Negative	18	0.08	Not suitable
Ambystoma ordinarium	Ambystoma	Ambystomatidae	EN	Yes	19.6703	-101.145	2021	Field swab	Qiagen DNeasy Blood and Tissue Kit	qPCR	Negative	18	0.08	Not suitable
Ambystoma ordinarium	Ambystoma	Ambystomatidae	EN	Yes	19.6703	-101.145	2021	Field swab	Qiagen DNeasy Blood and Tissue Kit	qPCR	Negative	18	0.08	Not suitable
Ambystoma ordinarium	Ambystoma	Ambystomatidae	EN	Yes	19.6703	-101.145	2021	Field swab	Qiagen DNeasy Blood and Tissue Kit	qPCR	Negative	18	0.08	Not suitable
Ambystoma ordinarium	Ambystoma	Ambystomatidae	EN	Yes	19.6703	-101.145	2021	Field swab	Qiagen DNeasy Blood and Tissue Kit	qPCR	Negative	18	0.08	Not suitable
Ambystoma ordinarium	Ambystoma	Ambystomatidae	EN	Yes	19.6867	-100.859	2021	Field swab	Qiagen DNeasy Blood and Tissue Kit	qPCR	Negative	18	0.39	Low suitability
Ambystoma ordinarium	Ambystoma	Ambystomatidae	EN	Yes	19.6867	-100.859	2021	Field swab	Qiagen DNeasy Blood and Tissue Kit	qPCR	Negative	18	0.39	Low suitability
Ambystoma ordinarium	Ambystoma	Ambystomatidae	EN	Yes	19.6867	-100.859	2021	Field swab	Qiagen DNeasy Blood and Tissue Kit	qPCR	Negative	18	0.39	Low suitability
Ambystoma ordinarium	Ambystoma	Ambystomatidae	EN	Yes	19.6867	-100.859	2021	Field swab	Qiagen DNeasy Blood and Tissue Kit	qPCR	Negative	18	0.39	Low suitability
Ambystoma ordinarium	Ambystoma	Ambystomatidae	EN	Yes	19.6867	-100.859	2021	Field swab	Qiagen DNeasy Blood and Tissue Kit	qPCR	Negative	18	0.39	Low suitability
Ambystoma ordinarium	Ambystoma	Ambystomatidae	EN	Yes	19.6867	-100.859	2021	Field swab	Qiagen DNeasy Blood and Tissue Kit	qPCR	Negative	18	0.39	Low suitability
Ambystoma ordinarium	Ambystoma	Ambystomatidae	EN	Yes	19.6867	-100.859	2021	Field swab	Qiagen DNeasy Blood and Tissue Kit	qPCR	Negative	18	0.39	Low suitability
Ambystoma ordinarium	Ambystoma	Ambystomatidae	EN	Yes	19.6867	-100.859	2021	Field swab	Qiagen DNeasy Blood and Tissue Kit	qPCR	Negative	18	0.39	Low suitability
Ambystoma ordinarium	Ambystoma	Ambystomatidae	EN	Yes	19.6867	-100.859	2021	Field swab	Qiagen DNeasy Blood and Tissue Kit	qPCR	Negative	18	0.39	Low suitability
Ambystoma ordinarium	Ambystoma	Ambystomatidae	EN	Yes	19.6867	-100.859	2021	Field swab	Qiagen DNeasy Blood and Tissue Kit	qPCR	Negative	18	0.39	Low suitability
Ambystoma ordinarium	Ambystoma	Ambystomatidae	EN	Yes	19.6867	-100.859	2021	Field swab	Qiagen DNeasy Blood and Tissue Kit	qPCR	Negative	18	0.39	Low suitability
Ambystoma ordinarium	Ambystoma	Ambystomatidae	EN	Yes	19.6867	-100.859	2021	Field swab	Qiagen DNeasy Blood and Tissue Kit	qPCR	Negative	18	0.39	Low suitability
Ambystoma ordinarium	Ambystoma	Ambystomatidae	EN	Yes	19.6867	-100.859	2021	Field swab	Qiagen DNeasy Blood and Tissue Kit	qPCR	Negative	18	0.39	Low suitability
Ambystoma ordinarium	Ambystoma	Ambystomatidae	EN	Yes	19.6867	-100.859	2021	Field swab	Qiagen DNeasy Blood and Tissue Kit	qPCR	Negative	18	0.39	Low suitability
Ambystoma ordinarium	Ambystoma	Ambystomatidae	EN	Yes	19.6867	-100.859	2021	Field swab	Qiagen DNeasy Blood and Tissue Kit	qPCR	Negative	18	0.39	Low suitability
Ambystoma ordinarium	Ambystoma	Ambystomatidae	EN	Yes	19.6867	-100.859	2021	Field swab	Qiagen DNeasy Blood and Tissue Kit	qPCR	Negative	18	0.39	Low suitability
Ambystoma ordinarium	Ambystoma	Ambystomatidae	EN	Yes	19.6867	-100.859	2021	Field swab	Qiagen DNeasy Blood and Tissue Kit	qPCR	Negative	18	0.39	Low suitability
Ambystoma ordinarium	Ambystoma	Ambystomatidae	EN	Yes	19.6867	-100.859	2021	Field swab	Qiagen DNeasy Blood and Tissue Kit	qPCR	Negative	18	0.39	Low suitability
Ambystoma ordinarium	Ambystoma	Ambystomatidae	EN	Yes	19.6867	-100.859	2021	Field swab	Qiagen DNeasy Blood and Tissue Kit	qPCR	Negative	18	0.39	Low suitability
Ambystoma ordinarium	Ambystoma	Ambystomatidae	EN	Yes	19.6867	-100.859	2021	Field swab	Qiagen DNeasy Blood and Tissue Kit	qPCR	Negative	18	0.39	Low suitability
Ambystoma ordinarium	Ambystoma	Ambystomatidae	EN	Yes	19.3246	-101.407	2021	Field swab	Qiagen DNeasy Blood and Tissue Kit	qPCR	Negative	19	0.1	Not suitable
Ambystoma ordinarium	Ambystoma	Ambystomatidae	EN	Yes	19.3246	-101.407	2021	Field swab	Qiagen DNeasy Blood and Tissue Kit	qPCR	Negative	19	0.1	Not suitable
Ambystoma ordinarium	Ambystoma	Ambystomatidae	EN	Yes	19.3246	-101.407	2021	Field swab	Qiagen DNeasy Blood and Tissue Kit	qPCR	Negative	19	0.1	Not suitable
Ambystoma ordinarium	Ambystoma	Ambystomatidae	EN	Yes	19.3246	-101.407	2021	Field swab	Qiagen DNeasy Blood and Tissue Kit	qPCR	Negative	19	0.1	Not suitable
Ambystoma ordinarium	Ambystoma	Ambystomatidae	EN	Yes	19.3246	-101.407	2021	Field swab	Qiagen DNeasy Blood and Tissue Kit	qPCR	Negative	19	0.1	Not suitable
Ambystoma ordinarium	Ambystoma	Ambystomatidae	EN	Yes	19.3246	-101.407	2021	Field swab	Qiagen DNeasy Blood and Tissue Kit	qPCR	Negative	19	0.1	Not suitable
Ambystoma ordinarium	Ambystoma	Ambystomatidae	EN	Yes	19.3246	-101.407	2021	Field swab	Qiagen DNeasy Blood and Tissue Kit	qPCR	Negative	19	0.1	Not suitable
Ambystoma ordinarium	Ambystoma	Ambystomatidae	EN	Yes	19.3246	-101.407	2021	Field swab	Qiagen DNeasy Blood and Tissue Kit	qPCR	Negative	19	0.1	Not suitable
Ambystoma ordinarium	Ambystoma	Ambystomatidae	EN	Yes	19.3246	-101.407	2021	Field swab	Qiagen DNeasy Blood and Tissue Kit	qPCR	Negative	19	0.1	Not suitable
Ambystoma ordinarium	Ambystoma	Ambystomatidae	EN	Yes	19.3246	-101.407	2021	Field swab	Qiagen DNeasy Blood and Tissue Kit	qPCR	Negative	19	0.1	Not suitable
Ambystoma ordinarium	Ambystoma	Ambystomatidae	EN	Yes	19.3246	-101.407	2021	Field swab	Qiagen DNeasy Blood and Tissue Kit	qPCR	Negative	19	0.1	Not suitable
Ambystoma ordinarium	Ambystoma	Ambystomatidae	EN	Yes	19.3246	-101.407	2021	Field swab	Qiagen DNeasy Blood and Tissue Kit	qPCR	Negative	19	0.1	Not suitable
Ambystoma ordinarium	Ambystoma	Ambystomatidae	EN	Yes	19.3246	-101.407	2021	Field swab	Qiagen DNeasy Blood and Tissue Kit	qPCR	Negative	19	0.1	Not suitable
Ambystoma ordinarium	Ambystoma	Ambystomatidae	EN	Yes	19.3246	-101.407	2021	Field swab	Qiagen DNeasy Blood and Tissue Kit	qPCR	Negative	19	0.1	Not suitable
Ambystoma ordinarium	Ambystoma	Ambystomatidae	EN	Yes	19.3246	-101.407	2021	Field swab	Qiagen DNeasy Blood and Tissue Kit	qPCR	Negative	19	0.1	Not suitable
Ambystoma ordinarium	Ambystoma	Ambystomatidae	EN	Yes	19.3246	-101.407	2021	Field swab	Qiagen DNeasy Blood and Tissue Kit	qPCR	Negative	19	0.1	Not suitable
Ambystoma ordinarium	Ambystoma	Ambystomatidae	EN	Yes	19.3246	-101.407	2021	Field swab	Qiagen DNeasy Blood and Tissue Kit	qPCR	Negative	19	0.1	Not suitable
Ambystoma ordinarium	Ambystoma	Ambystomatidae	EN	Yes	19.3246	-101.407	2021	Field swab	Qiagen DNeasy Blood and Tissue Kit	qPCR	Negative	19	0.1	Not suitable
Ambystoma ordinarium	Ambystoma	Ambystomatidae	EN	Yes	19.3246	-101.407	2021	Field swab	Qiagen DNeasy Blood and Tissue Kit	qPCR	Negative	19	0.1	Not suitable
Ambystoma ordinarium	Ambystoma	Ambystomatidae	EN	Yes	19.3246	-101.407	2021	Field swab	Qiagen DNeasy Blood and Tissue Kit	qPCR	Negative	19	0.1	Not suitable
Ambystoma ordinarium	Ambystoma	Ambystomatidae	EN	Yes	19.5196	-100.617	2021	Field swab	Qiagen DNeasy Blood and Tissue Kit	qPCR	Negative	15	0.36	Low suitability
Ambystoma ordinarium	Ambystoma	Ambystomatidae	EN	Yes	19.5196	-100.617	2021	Field swab	Qiagen DNeasy Blood and Tissue Kit	qPCR	Negative	15	0.36	Low suitability
Ambystoma ordinarium	Ambystoma	Ambystomatidae	EN	Yes	19.5196	-100.617	2021	Field swab	Qiagen DNeasy Blood and Tissue Kit	qPCR	Negative	15	0.36	Low suitability
Ambystoma ordinarium	Ambystoma	Ambystomatidae	EN	Yes	19.5196	-100.617	2021	Field swab	Qiagen DNeasy Blood and Tissue Kit	qPCR	Negative	15	0.36	Low suitability
Ambystoma ordinarium	Ambystoma	Ambystomatidae	EN	Yes	19.5196	-100.617	2021	Field swab	Qiagen DNeasy Blood and Tissue Kit	qPCR	Negative	15	0.36	Low suitability
Ambystoma ordinarium	Ambystoma	Ambystomatidae	EN	Yes	19.5196	-100.617	2021	Field swab	Qiagen DNeasy Blood and Tissue Kit	qPCR	Negative	15	0.36	Low suitability
Ambystoma ordinarium	Ambystoma	Ambystomatidae	EN	Yes	19.5196	-100.617	2021	Field swab	Qiagen DNeasy Blood and Tissue Kit	qPCR	Negative	15	0.36	Low suitability
Ambystoma ordinarium	Ambystoma	Ambystomatidae	EN	Yes	19.5196	-100.617	2021	Field swab	Qiagen DNeasy Blood and Tissue Kit	qPCR	Negative	15	0.36	Low suitability
Ambystoma ordinarium	Ambystoma	Ambystomatidae	EN	Yes	19.5196	-100.617	2021	Field swab	Qiagen DNeasy Blood and Tissue Kit	qPCR	Negative	15	0.36	Low suitability
Ambystoma ordinarium	Ambystoma	Ambystomatidae	EN	Yes	19.5196	-100.617	2021	Field swab	Qiagen DNeasy Blood and Tissue Kit	qPCR	Negative	15	0.36	Low suitability
Ambystoma ordinarium	Ambystoma	Ambystomatidae	EN	Yes	19.5196	-100.617	2021	Field swab	Qiagen DNeasy Blood and Tissue Kit	qPCR	Negative	15	0.36	Low suitability
Ambystoma ordinarium	Ambystoma	Ambystomatidae	EN	Yes	19.5196	-100.617	2021	Field swab	Qiagen DNeasy Blood and Tissue Kit	qPCR	Negative	15	0.36	Low suitability
Ambystoma ordinarium	Ambystoma	Ambystomatidae	EN	Yes	19.5196	-100.617	2021	Field swab	Qiagen DNeasy Blood and Tissue Kit	qPCR	Negative	15	0.36	Low suitability
Ambystoma ordinarium	Ambystoma	Ambystomatidae	EN	Yes	19.5196	-100.617	2021	Field swab	Qiagen DNeasy Blood and Tissue Kit	qPCR	Negative	15	0.36	Low suitability
Ambystoma ordinarium	Ambystoma	Ambystomatidae	EN	Yes	19.5196	-100.617	2021	Field swab	Qiagen DNeasy Blood and Tissue Kit	qPCR	Negative	15	0.36	Low suitability
Ambystoma ordinarium	Ambystoma	Ambystomatidae	EN	Yes	19.5196	-100.617	2021	Field swab	Qiagen DNeasy Blood and Tissue Kit	qPCR	Negative	15	0.36	Low suitability
Ambystoma ordinarium	Ambystoma	Ambystomatidae	EN	Yes	19.5196	-100.617	2021	Field swab	Qiagen DNeasy Blood and Tissue Kit	qPCR	Negative	15	0.36	Low suitability
Ambystoma ordinarium	Ambystoma	Ambystomatidae	EN	Yes	19.5196	-100.617	2021	Field swab	Qiagen DNeasy Blood and Tissue Kit	qPCR	Negative	15	0.36	Low suitability
Ambystoma ordinarium	Ambystoma	Ambystomatidae	EN	Yes	19.5196	-100.617	2021	Field swab	Qiagen DNeasy Blood and Tissue Kit	qPCR	Negative	15	0.36	Low suitability
Ambystoma ordinarium	Ambystoma	Ambystomatidae	EN	Yes	19.5196	-100.617	2021	Field swab	Qiagen DNeasy Blood and Tissue Kit	qPCR	Negative	15	0.36	Low suitability
Ambystoma rivulare	Ambystoma	Ambystomatidae	DD	Yes	19.2323	-99.9487	2016	Field swab	Prepman Ultra	qPCR	Negative	15	0.48	Low suitability
Ambystoma rivulare	Ambystoma	Ambystomatidae	DD	Yes	19.6088	-100.244	2018	Isolate	Qiagen DNeasy Blood and Tissue Kit	Fluidigm Juno system	Negative	14	0.55	Moderate suitability
Ambystoma taylori	Ambystoma	Ambystomatidae	CR	Yes	19.407	-97.3994	2021	Field swab	Qiagen DNeasy Blood and Tissue Kit	qPCR	Negative	16	0.13	Not suitable
Ambystoma taylori	Ambystoma	Ambystomatidae	CR	Yes	19.407	-97.3994	2021	Field swab	Qiagen DNeasy Blood and Tissue Kit	qPCR	Negative	16	0.13	Not suitable
Ambystoma taylori	Ambystoma	Ambystomatidae	CR	Yes	19.407	-97.3994	2021	Field swab	Qiagen DNeasy Blood and Tissue Kit	qPCR	Negative	16	0.13	Not suitable
Ambystoma taylori	Ambystoma	Ambystomatidae	CR	Yes	19.407	-97.3994	2021	Field swab	Qiagen DNeasy Blood and Tissue Kit	qPCR	Negative	16	0.13	Not suitable
Ambystoma taylori	Ambystoma	Ambystomatidae	CR	Yes	19.407	-97.3994	2021	Field swab	Qiagen DNeasy Blood and Tissue Kit	qPCR	Negative	16	0.13	Not suitable
Ambystoma taylori	Ambystoma	Ambystomatidae	CR	Yes	19.407	-97.3994	2021	Field swab	Qiagen DNeasy Blood and Tissue Kit	qPCR	Negative	16	0.13	Not suitable
Ambystoma taylori	Ambystoma	Ambystomatidae	CR	Yes	19.407	-97.3994	2021	Field swab	Qiagen DNeasy Blood and Tissue Kit	qPCR	Negative	16	0.13	Not suitable
Ambystoma taylori	Ambystoma	Ambystomatidae	CR	Yes	19.407	-97.3994	2021	Field swab	Qiagen DNeasy Blood and Tissue Kit	qPCR	Negative	16	0.13	Not suitable
Ambystoma taylori	Ambystoma	Ambystomatidae	CR	Yes	19.407	-97.3994	2021	Field swab	Qiagen DNeasy Blood and Tissue Kit	qPCR	Negative	16	0.13	Not suitable
Ambystoma taylori	Ambystoma	Ambystomatidae	CR	Yes	19.407	-97.3994	2021	Field swab	Qiagen DNeasy Blood and Tissue Kit	qPCR	Negative	16	0.13	Not suitable
Ambystoma taylori	Ambystoma	Ambystomatidae	CR	Yes	19.407	-97.3994	2021	Field swab	Qiagen DNeasy Blood and Tissue Kit	qPCR	Negative	16	0.13	Not suitable
Ambystoma taylori	Ambystoma	Ambystomatidae	CR	Yes	19.407	-97.3994	2021	Field swab	Qiagen DNeasy Blood and Tissue Kit	qPCR	Negative	16	0.13	Not suitable
Ambystoma taylori	Ambystoma	Ambystomatidae	CR	Yes	19.407	-97.3994	2021	Field swab	Qiagen DNeasy Blood and Tissue Kit	qPCR	Negative	16	0.13	Not suitable
Ambystoma taylori	Ambystoma	Ambystomatidae	CR	Yes	19.407	-97.3994	2021	Field swab	Qiagen DNeasy Blood and Tissue Kit	qPCR	Negative	16	0.13	Not suitable
Ambystoma taylori	Ambystoma	Ambystomatidae	CR	Yes	19.407	-97.3994	2021	Field swab	Qiagen DNeasy Blood and Tissue Kit	qPCR	Negative	16	0.13	Not suitable
Ambystoma taylori	Ambystoma	Ambystomatidae	CR	Yes	19.407	-97.3994	2021	Field swab	Qiagen DNeasy Blood and Tissue Kit	qPCR	Negative	16	0.13	Not suitable
Ambystoma taylori	Ambystoma	Ambystomatidae	CR	Yes	19.407	-97.3994	2021	Field swab	Qiagen DNeasy Blood and Tissue Kit	qPCR	Negative	16	0.13	Not suitable
Ambystoma taylori	Ambystoma	Ambystomatidae	CR	Yes	19.407	-97.3994	2021	Field swab	Qiagen DNeasy Blood and Tissue Kit	qPCR	Negative	16	0.13	Not suitable
Ambystoma taylori	Ambystoma	Ambystomatidae	CR	Yes	19.407	-97.3994	2021	Field swab	Qiagen DNeasy Blood and Tissue Kit	qPCR	Negative	16	0.13	Not suitable
Ambystoma taylori	Ambystoma	Ambystomatidae	CR	Yes	19.407	-97.3994	2021	Field swab	Qiagen DNeasy Blood and Tissue Kit	qPCR	Negative	16	0.13	Not suitable
Ambystoma taylori	Ambystoma	Ambystomatidae	CR	Yes	19.407	-97.3994	2021	Field swab	Qiagen DNeasy Blood and Tissue Kit	qPCR	Negative	16	0.13	Not suitable
Ambystoma taylori	Ambystoma	Ambystomatidae	CR	Yes	19.407	-97.3994	2021	Field swab	Qiagen DNeasy Blood and Tissue Kit	qPCR	Negative	16	0.13	Not suitable
Ambystoma taylori	Ambystoma	Ambystomatidae	CR	Yes	19.407	-97.3994	2021	Field swab	Qiagen DNeasy Blood and Tissue Kit	qPCR	Negative	16	0.13	Not suitable
Ambystoma taylori	Ambystoma	Ambystomatidae	CR	Yes	19.407	-97.3994	2021	Field swab	Qiagen DNeasy Blood and Tissue Kit	qPCR	Negative	16	0.13	Not suitable
Ambystoma velasci	Ambystoma	Ambystomatidae	LC	Yes	19.3326	-97.4543	2021	Field swab	Qiagen DNeasy Blood and Tissue Kit	qPCR	Negative	17	0.38	Low suitability
Ambystoma velasci	Ambystoma	Ambystomatidae	LC	Yes	19.3326	-97.4543	2021	Field swab	Qiagen DNeasy Blood and Tissue Kit	qPCR	Negative	17	0.38	Low suitability
Ambystoma velasci	Ambystoma	Ambystomatidae	LC	Yes	19.3326	-97.4543	2021	Field swab	Qiagen DNeasy Blood and Tissue Kit	qPCR	Negative	17	0.38	Low suitability
Ambystoma velasci	Ambystoma	Ambystomatidae	LC	Yes	19.3326	-97.4543	2021	Field swab	Qiagen DNeasy Blood and Tissue Kit	qPCR	Negative	17	0.38	Low suitability
Ambystoma velasci	Ambystoma	Ambystomatidae	LC	Yes	19.3326	-97.4543	2021	Field swab	Qiagen DNeasy Blood and Tissue Kit	qPCR	Negative	17	0.38	Low suitability
Ambystoma velasci	Ambystoma	Ambystomatidae	LC	Yes	19.3326	-97.4543	2021	Field swab	Qiagen DNeasy Blood and Tissue Kit	qPCR	Negative	17	0.38	Low suitability
Ambystoma velasci	Ambystoma	Ambystomatidae	LC	Yes	19.3326	-97.4543	2021	Field swab	Qiagen DNeasy Blood and Tissue Kit	qPCR	Negative	17	0.38	Low suitability
Ambystoma velasci	Ambystoma	Ambystomatidae	LC	Yes	19.3326	-97.4543	2021	Field swab	Qiagen DNeasy Blood and Tissue Kit	qPCR	Negative	17	0.38	Low suitability
Ambystoma velasci	Ambystoma	Ambystomatidae	LC	Yes	19.3326	-97.4543	2021	Field swab	Qiagen DNeasy Blood and Tissue Kit	qPCR	Negative	17	0.38	Low suitability
Ambystoma velasci	Ambystoma	Ambystomatidae	LC	Yes	19.3326	-97.4543	2021	Field swab	Qiagen DNeasy Blood and Tissue Kit	qPCR	Negative	17	0.38	Low suitability
Ambystoma velasci	Ambystoma	Ambystomatidae	LC	Yes	19.3326	-97.4543	2021	Field swab	Qiagen DNeasy Blood and Tissue Kit	qPCR	Negative	17	0.38	Low suitability
Ambystoma velasci	Ambystoma	Ambystomatidae	LC	Yes	19.3326	-97.4543	2021	Field swab	Qiagen DNeasy Blood and Tissue Kit	qPCR	Negative	17	0.38	Low suitability
Ambystoma velasci	Ambystoma	Ambystomatidae	LC	Yes	19.3326	-97.4543	2021	Field swab	Qiagen DNeasy Blood and Tissue Kit	qPCR	Negative	17	0.38	Low suitability
Ambystoma velasci	Ambystoma	Ambystomatidae	LC	Yes	19.3326	-97.4543	2021	Field swab	Qiagen DNeasy Blood and Tissue Kit	qPCR	Negative	17	0.38	Low suitability
Ambystoma velasci	Ambystoma	Ambystomatidae	LC	Yes	19.3326	-97.4543	2021	Field swab	Qiagen DNeasy Blood and Tissue Kit	qPCR	Negative	17	0.38	Low suitability
Ambystoma velasci	Ambystoma	Ambystomatidae	LC	Yes	19.3326	-97.4543	2021	Field swab	Qiagen DNeasy Blood and Tissue Kit	qPCR	Negative	17	0.38	Low suitability
Ambystoma velasci	Ambystoma	Ambystomatidae	LC	Yes	19.3326	-97.4543	2021	Field swab	Qiagen DNeasy Blood and Tissue Kit	qPCR	Negative	17	0.38	Low suitability
Ambystoma velasci	Ambystoma	Ambystomatidae	LC	Yes	19.3326	-97.4543	2021	Field swab	Qiagen DNeasy Blood and Tissue Kit	qPCR	Negative	17	0.38	Low suitability
Ambystoma velasci	Ambystoma	Ambystomatidae	LC	Yes	19.3326	-97.4543	2021	Field swab	Qiagen DNeasy Blood and Tissue Kit	qPCR	Negative	17	0.38	Low suitability
Ambystoma velasci	Ambystoma	Ambystomatidae	LC	Yes	19.3326	-97.4543	2021	Field swab	Qiagen DNeasy Blood and Tissue Kit	qPCR	Negative	17	0.38	Low suitability
Ambystoma velasci	Ambystoma	Ambystomatidae	LC	Yes	19.3326	-97.4543	2021	Field swab	Qiagen DNeasy Blood and Tissue Kit	qPCR	Negative	17	0.38	Low suitability
Ambystoma velasci	Ambystoma	Ambystomatidae	LC	Yes	19.3326	-97.4543	2021	Field swab	Qiagen DNeasy Blood and Tissue Kit	qPCR	Negative	17	0.38	Low suitability
Ambystoma velasci	Ambystoma	Ambystomatidae	LC	Yes	19.3326	-97.4543	2021	Field swab	Qiagen DNeasy Blood and Tissue Kit	qPCR	Negative	17	0.38	Low suitability
Ambystoma velasci	Ambystoma	Ambystomatidae	LC	Yes	19.3326	-97.4543	2021	Field swab	Qiagen DNeasy Blood and Tissue Kit	qPCR	Negative	17	0.38	Low suitability
Ambystoma velasci	Ambystoma	Ambystomatidae	LC	Yes	19.3326	-97.4543	2021	Field swab	Qiagen DNeasy Blood and Tissue Kit	qPCR	Negative	17	0.38	Low suitability
Ambystoma velasci	Ambystoma	Ambystomatidae	LC	Yes	19.3326	-97.4543	2021	Field swab	Qiagen DNeasy Blood and Tissue Kit	qPCR	Negative	17	0.38	Low suitability
Ambystoma velasci	Ambystoma	Ambystomatidae	LC	Yes	19.3326	-97.4543	2021	Field swab	Qiagen DNeasy Blood and Tissue Kit	qPCR	Negative	17	0.38	Low suitability
Ambystoma velasci	Ambystoma	Ambystomatidae	LC	Yes	19.3326	-97.4543	2021	Field swab	Qiagen DNeasy Blood and Tissue Kit	qPCR	Negative	17	0.38	Low suitability
Ambystoma velasci	Ambystoma	Ambystomatidae	LC	Yes	19.3326	-97.4543	2021	Field swab	Qiagen DNeasy Blood and Tissue Kit	qPCR	Negative	17	0.38	Low suitability
Ambystoma velasci	Ambystoma	Ambystomatidae	LC	Yes	19.3326	-97.4543	2021	Field swab	Qiagen DNeasy Blood and Tissue Kit	qPCR	Negative	17	0.38	Low suitability
Ambystoma velasci	Ambystoma	Ambystomatidae	LC	Yes	19.3731	-97.3828	2021	Field swab	Qiagen DNeasy Blood and Tissue Kit	qPCR	Negative	17	0.15	Not suitable
Ambystoma velasci	Ambystoma	Ambystomatidae	LC	Yes	19.3731	-97.3828	2021	Field swab	Qiagen DNeasy Blood and Tissue Kit	qPCR	Negative	17	0.15	Not suitable
Ambystoma velasci	Ambystoma	Ambystomatidae	LC	Yes	19.3731	-97.3828	2021	Field swab	Qiagen DNeasy Blood and Tissue Kit	qPCR	Negative	17	0.15	Not suitable
Ambystoma velasci	Ambystoma	Ambystomatidae	LC	Yes	19.3731	-97.3828	2021	Field swab	Qiagen DNeasy Blood and Tissue Kit	qPCR	Negative	17	0.15	Not suitable
Ambystoma velasci	Ambystoma	Ambystomatidae	LC	Yes	19.3731	-97.3828	2021	Field swab	Qiagen DNeasy Blood and Tissue Kit	qPCR	Negative	17	0.15	Not suitable
Ambystoma velasci	Ambystoma	Ambystomatidae	LC	Yes	19.3731	-97.3828	2021	Field swab	Qiagen DNeasy Blood and Tissue Kit	qPCR	Negative	17	0.15	Not suitable
Ambystoma velasci	Ambystoma	Ambystomatidae	LC	Yes	19.3731	-97.3828	2021	Field swab	Qiagen DNeasy Blood and Tissue Kit	qPCR	Negative	17	0.15	Not suitable
Ambystoma velasci	Ambystoma	Ambystomatidae	LC	Yes	19.3731	-97.3828	2021	Field swab	Qiagen DNeasy Blood and Tissue Kit	qPCR	Negative	17	0.15	Not suitable
Ambystoma velasci	Ambystoma	Ambystomatidae	LC	Yes	19.3731	-97.3828	2021	Field swab	Qiagen DNeasy Blood and Tissue Kit	qPCR	Negative	17	0.15	Not suitable
Ambystoma velasci	Ambystoma	Ambystomatidae	LC	Yes	19.3731	-97.3828	2021	Field swab	Qiagen DNeasy Blood and Tissue Kit	qPCR	Negative	17	0.15	Not suitable
Ambystoma velasci	Ambystoma	Ambystomatidae	LC	Yes	19.3731	-97.3828	2021	Field swab	Qiagen DNeasy Blood and Tissue Kit	qPCR	Negative	17	0.15	Not suitable
Ambystoma velasci	Ambystoma	Ambystomatidae	LC	Yes	19.3731	-97.3828	2021	Field swab	Qiagen DNeasy Blood and Tissue Kit	qPCR	Negative	17	0.15	Not suitable
Ambystoma velasci	Ambystoma	Ambystomatidae	LC	Yes	19.3731	-97.3828	2021	Field swab	Qiagen DNeasy Blood and Tissue Kit	qPCR	Negative	17	0.15	Not suitable
Ambystoma velasci	Ambystoma	Ambystomatidae	LC	Yes	19.3731	-97.3828	2021	Field swab	Qiagen DNeasy Blood and Tissue Kit	qPCR	Negative	17	0.15	Not suitable
Ambystoma velasci	Ambystoma	Ambystomatidae	LC	Yes	19.3731	-97.3828	2021	Field swab	Qiagen DNeasy Blood and Tissue Kit	qPCR	Negative	17	0.15	Not suitable
Ambystoma velasci	Ambystoma	Ambystomatidae	LC	Yes	19.3731	-97.3828	2021	Field swab	Qiagen DNeasy Blood and Tissue Kit	qPCR	Negative	17	0.15	Not suitable
Ambystoma velasci	Ambystoma	Ambystomatidae	LC	Yes	19.3731	-97.3828	2021	Field swab	Qiagen DNeasy Blood and Tissue Kit	qPCR	Negative	17	0.15	Not suitable
Ambystoma velasci	Ambystoma	Ambystomatidae	LC	Yes	19.3731	-97.3828	2021	Field swab	Qiagen DNeasy Blood and Tissue Kit	qPCR	Negative	17	0.15	Not suitable
Ambystoma velasci	Ambystoma	Ambystomatidae	LC	Yes	19.3731	-97.3828	2021	Field swab	Qiagen DNeasy Blood and Tissue Kit	qPCR	Negative	17	0.15	Not suitable
Ambystoma velasci	Ambystoma	Ambystomatidae	LC	Yes	19.3731	-97.3828	2021	Field swab	Qiagen DNeasy Blood and Tissue Kit	qPCR	Negative	17	0.15	Not suitable
Ambystoma velasci	Ambystoma	Ambystomatidae	LC	Yes	19.3731	-97.3828	2021	Field swab	Qiagen DNeasy Blood and Tissue Kit	qPCR	Negative	17	0.15	Not suitable
Ambystoma velasci	Ambystoma	Ambystomatidae	LC	Yes	19.3731	-97.3828	2021	Field swab	Qiagen DNeasy Blood and Tissue Kit	qPCR	Negative	17	0.15	Not suitable
Ambystoma velasci	Ambystoma	Ambystomatidae	LC	Yes	19.3731	-97.3828	2021	Field swab	Qiagen DNeasy Blood and Tissue Kit	qPCR	Negative	17	0.15	Not suitable
Ambystoma velasci	Ambystoma	Ambystomatidae	LC	Yes	19.3731	-97.3828	2021	Field swab	Qiagen DNeasy Blood and Tissue Kit	qPCR	Negative	17	0.15	Not suitable
Ambystoma velasci	Ambystoma	Ambystomatidae	LC	Yes	19.3731	-97.3828	2021	Field swab	Qiagen DNeasy Blood and Tissue Kit	qPCR	Negative	17	0.15	Not suitable
Ambystoma velasci	Ambystoma	Ambystomatidae	LC	Yes	19.3731	-97.3828	2021	Field swab	Qiagen DNeasy Blood and Tissue Kit	qPCR	Negative	17	0.15	Not suitable
Ambystoma velasci	Ambystoma	Ambystomatidae	LC	Yes	19.3731	-97.3828	2021	Field swab	Qiagen DNeasy Blood and Tissue Kit	qPCR	Negative	17	0.15	Not suitable
Ambystoma velasci	Ambystoma	Ambystomatidae	LC	Yes	19.3731	-97.3828	2021	Field swab	Qiagen DNeasy Blood and Tissue Kit	qPCR	Negative	17	0.15	Not suitable
Ambystoma velasci	Ambystoma	Ambystomatidae	LC	Yes	19.3731	-97.3828	2021	Field swab	Qiagen DNeasy Blood and Tissue Kit	qPCR	Negative	17	0.15	Not suitable
Ambystoma velasci	Ambystoma	Ambystomatidae	LC	Yes	19.3731	-97.3828	2021	Field swab	Qiagen DNeasy Blood and Tissue Kit	qPCR	Negative	17	0.15	Not suitable
Anaxyrus boreas	Anaxyrus	Bufonidae	LC	No	31.0144	-115.5	2018	Isolate	Qiagen DNeasy Blood and Tissue Kit	Fluidigm Juno system	Negative	7	0.13	Not suitable
Anaxyrus boreas	Anaxyrus	Bufonidae	LC	No	31.8611	-116.398	2018	Isolate	Qiagen DNeasy Blood and Tissue Kit	Fluidigm Juno system	Negative	8	0.02	Not suitable
Anaxyrus boreas	Anaxyrus	Bufonidae	LC	No	31.8611	-116.398	2018	Isolate	Qiagen DNeasy Blood and Tissue Kit	Fluidigm Juno system	Negative	8	0.02	Not suitable
Aquiloeurycea cafetalera	Aquiloeurycea	Plethodontidae	VU	Yes	19.4376	-97.041	2016	Field swab	Prepman Ultra	qPCR	Negative	27	0.33	Low suitability
Bolitoglossa franklini	Bolitoglossa	Plethodontidae	EN	No	15.6564	-92.8167	2016	Field swab	Prepman Ultra	qPCR	Negative	17	0.1	Not suitable
Bolitoglossa occidentalis	Bolitoglossa	Plethodontidae	LC	No	15.6564	-92.8167	2016	Field swab	Prepman Ultra	qPCR	Negative	17	0.1	Not suitable
Bolitoglossa occidentalis	Bolitoglossa	Plethodontidae	LC	No	15.7143	-92.948	2016	Field swab	Prepman Ultra	Fluidigm Juno system	Negative	14	0.05	Not suitable
Bolitoglossa occidentalis	Bolitoglossa	Plethodontidae	LC	No	15.7143	-92.948	2016	Field swab	Prepman Ultra	Fluidigm Juno system	Negative	14	0.05	Not suitable
Bolitoglossa platydactyla	Bolitoglossa	Plethodontidae	NT	Yes	18.8827	-96.9317	2017	Field swab	Prepman Ultra	Fluidigm Juno system	Negative	26	0.02	Not suitable
Chiropterotriton totonacus	Chiropterotriton	Plethodontidae	CR	Yes	19.5274	-97.1532	2016	Field swab	Prepman Ultra	qPCR	Negative	24	0.93	High suitability
Craugastor matudai	Craugastor	Craugastoridae	VU	No	15.657	-92.8159	2016	Field swab	Prepman Ultra	Fluidigm Juno system	Negative	17	0.1	Not suitable
Craugastor matudai	Craugastor	Craugastoridae	VU	No	15.7143	-92.948	2016	Field swab	Prepman Ultra	Fluidigm Juno system	Negative	14	0.05	Not suitable
Craugastor pygmaeus	Craugastor	Craugastoridae	VU	No	15.9624	-96.5696	2017	Isolate	Qiagen DNeasy Blood and Tissue Kit	Fluidigm Juno system	Negative	23	0.06	Not suitable
Craugastor rhodopis	Craugastor	Craugastoridae	VU	Yes	19.4421	-97.041	2017	Isolate	Qiagen DNeasy Blood and Tissue Kit	Fluidigm Juno system	Negative	28	0.33	Low suitability
Craugastor rhodopis	Craugastor	Craugastoridae	VU	Yes	19.4421	-97.041	2017	Isolate	Qiagen DNeasy Blood and Tissue Kit	Fluidigm Juno system	Negative	28	0.33	Low suitability
Craugastor sp.	Craugastor	Craugastoridae	-	No	19.3836	-97.0029	2016	Field swab	Prepman Ultra	Fluidigm Juno system	Negative	25	0.08	Not suitable
Craugastor sp.	Craugastor	Craugastoridae	-	No	15.0613	-92.1272	2016	Field swab	Prepman Ultra	Fluidigm Juno system	Negative	20	0.03	Not suitable
Craugastor sp.	Craugastor	Craugastoridae	VU	No	19.6434	-97.1775	2017	Isolate	Qiagen DNeasy Blood and Tissue Kit	Fluidigm Juno system	Negative	23	0.29	Low suitability
Dendrotriton xolocalcae	Dendrotriton	Plethodontidae	VU	Yes	15.6564	-92.8167	2016	Field swab	Prepman Ultra	qPCR	Negative	17	0.1	Not suitable
Dendrotriton xolocalcae	Dendrotriton	Plethodontidae	VU	Yes	15.6564	-92.8167	2016	Field swab	Prepman Ultra	Fluidigm Juno system	Negative	17	0.1	Not suitable
Dryophytes arenicolor	Dryophytes	Hylidae	LC	No	20.972	-101.26	2018	Isolate	Qiagen DNeasy Blood and Tissue Kit	Fluidigm Juno system	Negative	10	0.03	Not suitable
Dryophytes arenicolor	Dryophytes	Hylidae	LC	No	20.972	-101.26	2018	Isolate	Qiagen DNeasy Blood and Tissue Kit	Fluidigm Juno system	Negative	10	0.03	Not suitable
Eleutherodactylus sp.	Eleutherodactylus	Eleutherodactylidae	-	No	23.0987	-99.1911	2019	Field swab	Prepman Ultra	Fluidigm Juno system	Negative	18	0.01	Not suitable
Hyliola cadaverina	Hyliola	Hylidae	LC	No	29.7265	-114.713	2018	Isolate	Qiagen DNeasy Blood and Tissue Kit	Fluidigm Juno system	Negative	3	0.01	Not suitable
Hyliola cadaverina	Hyliola	Hylidae	LC	No	29.7265	-114.713	2018	Isolate	Qiagen DNeasy Blood and Tissue Kit	Fluidigm Juno system	Negative	3	0.01	Not suitable
Hyliola cadaverina	Hyliola	Hylidae	LC	No	29.7265	-114.713	2018	Isolate	Qiagen DNeasy Blood and Tissue Kit	Fluidigm Juno system	Negative	3	0.01	Not suitable
Hyliola regilla	Hyliola	Hylidae	LC	No	30.8939	-115.482	2018	Isolate	Qiagen DNeasy Blood and Tissue Kit	Fluidigm Juno system	Negative	7	0.07	Not suitable
Hyliola regilla	Hyliola	Hylidae	LC	No	30.9016	-115.483	2018	Isolate	Qiagen DNeasy Blood and Tissue Kit	Fluidigm Juno system	Negative	7	0.07	Not suitable
Hyliola regilla	Hyliola	Hylidae	LC	No	30.9016	-115.483	2018	Isolate	Qiagen DNeasy Blood and Tissue Kit	Fluidigm Juno system	Negative	7	0.07	Not suitable
Hyliola regilla	Hyliola	Hylidae	LC	No	30.8939	-115.482	2018	Isolate	Qiagen DNeasy Blood and Tissue Kit	Fluidigm Juno system	Negative	7	0.07	Not suitable
Hyliola regilla	Hyliola	Hylidae	LC	No	31.0671	-115.505	2018	Isolate	Qiagen DNeasy Blood and Tissue Kit	Fluidigm Juno system	Negative	8	0.12	Not suitable
Hyliola regilla	Hyliola	Hylidae	LC	No	31.0671	-115.505	2018	Isolate	Qiagen DNeasy Blood and Tissue Kit	Fluidigm Juno system	Negative	8	0.12	Not suitable
Hyliola regilla	Hyliola	Hylidae	LC	No	28.6123	-114.051	2018	Isolate	Qiagen DNeasy Blood and Tissue Kit	Fluidigm Juno system	Negative	3	0.02	Not suitable
Hyliola regilla	Hyliola	Hylidae	LC	No	28.6123	-114.051	2018	Isolate	Qiagen DNeasy Blood and Tissue Kit	Fluidigm Juno system	Negative	3	0.02	Not suitable
Hyliola regilla	Hyliola	Hylidae	LC	No	28.6123	-114.051	2018	Isolate	Qiagen DNeasy Blood and Tissue Kit	Fluidigm Juno system	Negative	3	0.02	Not suitable
Hyliola regilla	Hyliola	Hylidae	LC	No	28.6123	-114.051	2018	Isolate	Qiagen DNeasy Blood and Tissue Kit	Fluidigm Juno system	Negative	3	0.02	Not suitable
Hyliola regilla	Hyliola	Hylidae	LC	No	28.6123	-114.051	2018	Isolate	Qiagen DNeasy Blood and Tissue Kit	Fluidigm Juno system	Negative	3	0.02	Not suitable
Hyliola regilla	Hyliola	Hylidae	LC	No	28.6123	-114.051	2018	Isolate	Qiagen DNeasy Blood and Tissue Kit	Fluidigm Juno system	Negative	3	0.02	Not suitable
Hyliola regilla	Hyliola	Hylidae	LC	No	28.6123	-114.051	2018	Isolate	Qiagen DNeasy Blood and Tissue Kit	Fluidigm Juno system	Negative	3	0.02	Not suitable
Hyliola regilla	Hyliola	Hylidae	LC	No	29.7254	-114.715	2018	Isolate	Qiagen DNeasy Blood and Tissue Kit	Fluidigm Juno system	Negative	4	0.01	Not suitable
Hyliola regilla	Hyliola	Hylidae	LC	No	29.7254	-114.715	2018	Isolate	Qiagen DNeasy Blood and Tissue Kit	Fluidigm Juno system	Negative	4	0.01	Not suitable
Hyliola regilla	Hyliola	Hylidae	LC	No	29.7254	-114.715	2018	Isolate	Qiagen DNeasy Blood and Tissue Kit	Fluidigm Juno system	Negative	4	0.01	Not suitable
Hyliola regilla	Hyliola	Hylidae	LC	No	29.7254	-114.715	2018	Isolate	Qiagen DNeasy Blood and Tissue Kit	Fluidigm Juno system	Negative	4	0.01	Not suitable
Hyliola regilla	Hyliola	Hylidae	LC	No	29.7254	-114.715	2018	Isolate	Qiagen DNeasy Blood and Tissue Kit	Fluidigm Juno system	Negative	4	0.01	Not suitable
Hyliola regilla	Hyliola	Hylidae	LC	No	29.7254	-114.715	2018	Isolate	Qiagen DNeasy Blood and Tissue Kit	Fluidigm Juno system	Negative	4	0.01	Not suitable
Hyliola regilla	Hyliola	Hylidae	LC	No	29.7254	-114.715	2018	Isolate	Qiagen DNeasy Blood and Tissue Kit	Fluidigm Juno system	Negative	4	0.01	Not suitable
Hyliola regilla	Hyliola	Hylidae	LC	No	31.8946	-116.398	2018	Isolate	Qiagen DNeasy Blood and Tissue Kit	Fluidigm Juno system	Negative	8	0.02	Not suitable
Hyliola regilla	Hyliola	Hylidae	LC	No	31.8946	-116.398	2018	Isolate	Qiagen DNeasy Blood and Tissue Kit	Fluidigm Juno system	Negative	8	0.02	Not suitable
Incilius sp.	Incilius	Bufonidae	-	No	16.9109	-93.6116	2016	Field swab	Prepman Ultra	Fluidigm Juno system	Negative	16	0.01	Not suitable
Leptodactylus melanonotus	Leptodactylus	Leptodactylidae	LC	No	17.2908	-100.28	2018	Isolate	Qiagen DNeasy Blood and Tissue Kit	Fluidigm Juno system	Negative	18	0.02	Not suitable
Leptodactylus melanonotus	Leptodactylus	Leptodactylidae	LC	No	17.2908	-100.28	2018	Isolate	Qiagen DNeasy Blood and Tissue Kit	Fluidigm Juno system	Negative	18	0.02	Not suitable
Leptodactylus melanonotus	Leptodactylus	Leptodactylidae	LC	No	19.4636	-103.71	2018	Isolate	Qiagen DNeasy Blood and Tissue Kit	Fluidigm Juno system	Negative	25	0.02	Not suitable
Parvimolge townsendi	Parvimolge	Plethodontidae	CR	Yes	19.4376	-97.041	2016	Field swab	Prepman Ultra	qPCR	Negative	27	0.33	Low suitability
Plectrohyla	Plectrohyla	Hylidae	LC	No	15.0856	-92.0851	2018	Isolate	Qiagen DNeasy Blood and Tissue Kit	Fluidigm Juno system	Negative	22	0.09	Not suitable
Plectrohyla matudai	Plectrohyla	Hylidae	EN	No	15.0613	-92.1272	2016	Field swab	Prepman Ultra	Fluidigm Juno system	Negative	20	0.03	Not suitable
Pseudoeurycea leprosa	Pseudoeurycea	Plethodontidae	LC	Yes	19.2449	-97.9987	2015	Isolate	Qiagen DNeasy Blood and Tissue Kit	Fluidigm Juno system	Negative	11	0.87	High suitability
Pseudoeurycea leprosa	Pseudoeurycea	Plethodontidae	LC	Yes	19.2449	-97.9987	2016	Field swab	Prepman Ultra	qPCR	Negative	11	0.87	High suitability
Pseudoeurycea longicauda	Pseudoeurycea	Plethodontidae	EN	Yes	19.2323	-99.9487	2016	Field swab	Prepman Ultra	qPCR	Negative	15	0.48	Low suitability
Ptychochyla zophodes	Ptychochyla	Hylidae	DD	Yes	17.7309	-96.5606	2018	Isolate	Qiagen DNeasy Blood and Tissue Kit	Fluidigm Juno system	Negative	14	0.04	Not suitable
Ptycohyla sp.	Ptycohyla	Hylidae	-	No	16.8969	-95.763	2018	Isolate	Qiagen DNeasy Blood and Tissue Kit	Fluidigm Juno system	Negative	7	0.4	Low suitability
Ptycohyla sp.	Ptycohyla	Hylidae	-	No	16.8969	-95.763	2018	Isolate	Qiagen DNeasy Blood and Tissue Kit	Fluidigm Juno system	Negative	7	0.4	Low suitability
Rana berlandieri	Rana	Ranidae	LC	No	18.8736	-97.0168	2017	Isolate	Qiagen DNeasy Blood and Tissue Kit	Fluidigm Juno system	Negative	28	0.02	Not suitable
Rana berlandieri	Rana	Ranidae	LC	No	21.0736	-99.1417	2018	Isolate	Qiagen DNeasy Blood and Tissue Kit	Fluidigm Juno system	Negative	18	0.03	Not suitable
Rana berlandieri	Rana	Ranidae	LC	No	21.0736	-99.1417	2018	Isolate	Qiagen DNeasy Blood and Tissue Kit	Fluidigm Juno system	Negative	18	0.03	Not suitable
Rana catesbeiana	Rana	Ranidae	LC	No	21.1755	-97.8476	2018	Isolate	Qiagen DNeasy Blood and Tissue Kit	Fluidigm Juno system	Negative	13	0.02	Not suitable
Rana draytonii	Rana	Ranidae	VU	No	30.8939	-115.482	2018	Isolate	Qiagen DNeasy Blood and Tissue Kit	Fluidigm Juno system	Negative	7	0.07	Not suitable
Rana montezumae	Rana	Ranidae	LC	Yes	19.3182	-99.1943	2017	Isolate	Qiagen DNeasy Blood and Tissue Kit	Fluidigm Juno system	Negative	13	0.16	Not suitable
Rana montezumae	Rana	Ranidae	LC	Yes	19.3182	-99.1943	2017	Isolate	Qiagen DNeasy Blood and Tissue Kit	Fluidigm Juno system	Negative	13	0.16	Not suitable
Rana montezumae	Rana	Ranidae	LC	Yes	19.3182	-99.1943	2017	Isolate	Qiagen DNeasy Blood and Tissue Kit	Fluidigm Juno system	Negative	13	0.16	Not suitable
Rana montezumae	Rana	Ranidae	LC	Yes	19.3182	-99.1943	2017	Isolate	Qiagen DNeasy Blood and Tissue Kit	Fluidigm Juno system	Negative	13	0.16	Not suitable
Rana montezumae	Rana	Ranidae	LC	Yes	19.4901	-99.8456	2017	Isolate	Qiagen DNeasy Blood and Tissue Kit	Fluidigm Juno system	Negative	13	0.28	Low suitability
Rana montezumae	Rana	Ranidae	LC	Yes	19.6088	-100.244	2018	Isolate	Qiagen DNeasy Blood and Tissue Kit	Fluidigm Juno system	Negative	14	0.55	Moderate suitability
Rana montezumae	Rana	Ranidae	LC	Yes	19.6818	-100.23	2018	Isolate	Qiagen DNeasy Blood and Tissue Kit	Fluidigm Juno system	Negative	13	0.54	Moderate suitability
Rana montezumae	Rana	Ranidae	LC	Yes	20.972	-101.26	2018	Isolate	Qiagen DNeasy Blood and Tissue Kit	Fluidigm Juno system	Negative	10	0.03	Not suitable
Rana montezumae	Rana	Ranidae	LC	Yes	20.972	-101.26	2018	Isolate	Qiagen DNeasy Blood and Tissue Kit	Fluidigm Juno system	Negative	10	0.03	Not suitable
Rana montezumae	Rana	Ranidae	LC	Yes	20.972	-101.26	2018	Isolate	Qiagen DNeasy Blood and Tissue Kit	Fluidigm Juno system	Negative	10	0.03	Not suitable
Rana montezumae	Rana	Ranidae	LC	Yes	20.972	-101.26	2018	Isolate	Qiagen DNeasy Blood and Tissue Kit	Fluidigm Juno system	Negative	10	0.03	Not suitable
Rana montezumae	Rana	Ranidae	LC	Yes	19.6333	-99.4833	2019	Field swab	Prepman Ultra	qPCR	Negative	10	0.5	Moderate suitability
Rana neovolcanica	Rana	Ranidae	NT	Yes	19.6499	-101.223	2017	Isolate	Qiagen DNeasy Blood and Tissue Kit	Fluidigm Juno system	Negative	18	0.05	Not suitable
Rana neovolcanica	Rana	Ranidae	NT	Yes	19.6499	-101.223	2017	Isolate	Qiagen DNeasy Blood and Tissue Kit	Fluidigm Juno system	Negative	18	0.05	Not suitable
Rana neovolcanica	Rana	Ranidae	NT	Yes	19.6499	-101.223	2017	Isolate	Qiagen DNeasy Blood and Tissue Kit	Fluidigm Juno system	Negative	18	0.05	Not suitable
Rana neovolcanica	Rana	Ranidae	NT	Yes	19.6499	-101.223	2017	Isolate	Qiagen DNeasy Blood and Tissue Kit	Fluidigm Juno system	Negative	18	0.05	Not suitable
Rana neovolcanica	Rana	Ranidae	NT	Yes	19.6499	-101.223	2017	Isolate	Qiagen DNeasy Blood and Tissue Kit	Fluidigm Juno system	Negative	18	0.05	Not suitable
Rana neovolcanica	Rana	Ranidae	NT	Yes	19.6499	-101.223	2017	Isolate	Qiagen DNeasy Blood and Tissue Kit	Fluidigm Juno system	Negative	18	0.05	Not suitable
Rana sierramadrensis	Rana	Ranidae	VU	Yes	17.3145	-100.212	2018	Isolate	Qiagen DNeasy Blood and Tissue Kit	Fluidigm Juno system	Negative	19	0.02	Not suitable
Rana sierramadrensis	Rana	Ranidae	VU	Yes	17.2531	-100.315	2018	Isolate	Qiagen DNeasy Blood and Tissue Kit	Fluidigm Juno system	Negative	18	0.03	Not suitable
Rana sp.	Rana	Ranidae	-	No	16.5561	-96.0273	2018	Field swab	Prepman Ultra	Fluidigm Juno system	Negative	7	0.01	Not suitable
Rana sp.	Rana	Ranidae	-	No	16.5561	-96.0273	2018	Field swab	Prepman Ultra	Fluidigm Juno system	Negative	7	0.01	Not suitable
Rana sp.	Rana	Ranidae	-	No	16.5561	-96.0273	2018	Field swab	Prepman Ultra	Fluidigm Juno system	Negative	7	0.01	Not suitable
Rana sp.	Rana	Ranidae	-	No	19.4636	-103.71	2018	Isolate	Qiagen DNeasy Blood and Tissue Kit	Fluidigm Juno system	Negative	25	0.02	Not suitable
Rana sp.	Rana	Ranidae	-	No	19.4636	-103.71	2018	Isolate	Qiagen DNeasy Blood and Tissue Kit	Fluidigm Juno system	Negative	25	0.02	Not suitable
Rana sp.	Rana	Ranidae	-	No	21.2726	-99.1578	2018	Field swab	Prepman Ultra	Fluidigm Juno system	Negative	18	0.02	Not suitable
Rana sp.	Rana	Ranidae	-	No	22.4871	-99.4737	2018	Field swab	Prepman Ultra	Fluidigm Juno system	Negative	11	0.01	Not suitable
Scinax staufferi	Scinax	Hylidae	LC	No	18.8736	-97.0168	2017	Isolate	Qiagen DNeasy Blood and Tissue Kit	Fluidigm Juno system	Negative	28	0.02	Not suitable
Scinax staufferi	Scinax	Hylidae	LC	No	18.8736	-97.0168	2017	Isolate	Qiagen DNeasy Blood and Tissue Kit	Fluidigm Juno system	Negative	28	0.02	Not suitable
Scinax staufferi	Scinax	Hylidae	LC	No	18.8736	-97.0168	2017	Isolate	Qiagen DNeasy Blood and Tissue Kit	Fluidigm Juno system	Negative	28	0.02	Not suitable
Scinax staufferi	Scinax	Hylidae	LC	No	18.8736	-97.0168	2017	Isolate	Qiagen DNeasy Blood and Tissue Kit	Fluidigm Juno system	Negative	28	0.02	Not suitable
Scinax staufferi	Scinax	Hylidae	LC	No	18.8736	-97.0168	2017	Isolate	Qiagen DNeasy Blood and Tissue Kit	Fluidigm Juno system	Negative	28	0.02	Not suitable
Smilisca baudinii	Smilisca	Hylidae	LC	No	18.8648	-97.0046	2017	Isolate	Qiagen DNeasy Blood and Tissue Kit	Fluidigm Juno system	Negative	28	0.02	Not suitable
Smilisca baudinii	Smilisca	Hylidae	LC	No	16.0878	-91.1899	2018	Field swab	Prepman Ultra	Fluidigm Juno system	Negative	12	0.11	Not suitable
Tlalocohyla loquax	Tlalocohyla	Hylidae	LC	No	16.9109	-93.6116	2016	Field swab	Prepman Ultra	Fluidigm Juno system	Negative	16	0.01	Not suitable
Tripion spinosus	Tripion	Hylidae	LC	No	18.8648	-97.0046	2017	Isolate	Qiagen DNeasy Blood and Tissue Kit	Fluidigm Juno system	Negative	28	0.02	Not suitable
